# Supplementary material for: 3640 Unique EST Clusters from the Medaka Testis and Their Potential Use for Identifying Conserved Testicular Gene Expression in Fish and Mammals
Source: PLoS One. 2008 Dec 23;3(12):e3915. doi: 10.1371/journal.pone.0003915 (PMC2603314; doi:10.1371/journal.pone.0003915)
Supplement: Table S4 — Summary of ontology analysis of 1197 genes with known molecular/biochemical putative function (0.21 MB XLS) [file pone.0003915.s004.xls]

## Sheet: Lo et al Table S4
Table S4. Summary of ontology analysis of 1197 genes with known molecular/biochemical putative function
EMBL accession number	EST cluster ID	EST clone ID	Gene annotation
Cellular Singaling (188)
FM165840	2674	M071--H9_065	ref|XP_537047.2| PREDICTED: similar to Vav-3 protein [Canis familiaris]
FM167115	139	m010--H12_082	gb|ABC72406.1| activin beta B precursor [Ctenopharyngodon idella]
FM168113	2902	M072--D4_026	Transcribed locus, weakly similar to NP_998384.1 A kinase (PRKA) anchor protein 8-like [Danio rerio]
FM167041	1965	M070--D9_073	dbj|BAA92816.1| calcitonin gene-related peptide receptor [Paralichthys olivaceus]
FM165901	2849	M044--A7_063	Transcribed locus, moderately similar to NP_001033068.1 adiponectin receptor 2 [Rattus norvegicus]
FM170646	832	M072--E12_088	ref|XP_685893.2| PREDICTED: similar to RAPGEF2 protein [Danio rerio]
FM166697	656	M038--C3_027	ref|NP_001101565.1| protein tyrosine phosphatase, receptor type, B [Rattus norvegicus]
FM168470	90	M072--A5_047	Transcribed locus, moderately similar to XP_001511258.1 PREDICTED: similar to Bruton agammaglobulinemia tyrosine kinase [Ornithorhynchus anatinus]
FM170108	3165	m014--A6_048	gb|AAH92169.1| Pik3c3 protein [Danio rerio]
FM167448	1727	m013--H12_082	Gi1 alpha subunit
FM168000	3126	M088--D5_041	gb|AAH44431.1| Ras homolog gene family, member T1a [Danio rerio]
FM167043	361	M086--D8_058	ref|XP_001337294.1| PREDICTED: similar to STK19 protein [Danio rerio]
FM167375	992	m006--H10_089	Transcribed locus, weakly similar to XP_001252733.1 PREDICTED: similar to TRIP12 protein [Bos taurus]
FM167087	1949	M084--G1_003	ref|NP_001012388.1| discs, large (Drosophila) homolog 1, like [Danio rerio]
FM172138	528	M090--F8_054	Transcribed locus, strongly similar to NP_001020276.1 casein kinase 1, alpha 1 isoform 1 [Homo sapiens]
FM168048	3419	M005--E11_087	Transcribed locus, weakly similar to XP_001344550.1 PREDICTED: similar to WD SOCS-box protein 2 [Danio rerio]
FM166408	3183	M087--B7_061	Transcribed locus, weakly similar to NP_083553.2 Rho GTPase activating protein 12 isoform 2 [Mus musculus]
FM166679	3244	M084--D9_073	ref|NP_001002299.1| protein tyrosine phosphatase, receptor type, U [Danio rerio]
FM167760	2249	M083--E9_071	Transcribed locus, moderately similar to NP_955925.1 Rac GTPase-activating protein 1 [Danio rerio]
FM166190	1560	M025--H3_017	Estrogen-related receptor gamma type 2
FM166970	2011	m013--B9_077	gb|AAH71309.1| Dual specificity phosphatase 1 [Danio rerio]
FM166142	1088	M066--A3_031	gb|AAH99988.1| NIMA (never in mitosis gene a)-related kinase 8 [Danio rerio]
FM167657	2973	M083--G5_035	Transcribed locus, moderately similar to NP_001002071.1 sirtuin (silent mating type information regulation 2 homolog) 6 [Danio rerio]
FM167633	443	M074--B9_077	Transcribed locus, weakly similar to NP_002190.2 interferon regulatory factor 2 [Homo sapiens]
FM168230	1477	M068--C12_092	ref|XP_001363300.1| PREDICTED: similar to rho/rac-interacting citron kinase isoform 3
FM169046	1071	M021--F12_086	Transcribed locus, weakly similar to NP_082686.1 interferon-inducible, double stranded RNA dependent inhibitor, protein-kinase [Mus musculus]
FM168600	2465	M091--E1_007	gb|AAP97499.1| notch ligand [Danio rerio]
FM168976	3386	M045--A2_016	Transcribed locus, strongly similar to XP_001334096.1 PREDICTED: similar to ryPTPR2Ab [Danio rerio]
FM167158	3489	M092--F8_054	Transcribed locus, moderately similar to NP_036356.1 NIMA (never in mitosis gene a)-related kinase 1 [Homo sapiens]
FM168751	445	M092--F2_006	ref|NP_998252.1| stromal cell derived factor 4 [Danio rerio]
FM166822	189	M022--F5_037	gb|AAO88982.1| T cell receptor alpha chain [Stegastes partitus]
FM170584	633	M003--F6_048	ref|XP_001232431.1| PREDICTED: similar to p87 phosphoinositide 3-kinase gamma adapter
FM167952	613	M089--D9_073	gb|ABO38854.1| inhibitor kappa B alpha [Paralichthys olivaceus]
FM166337	1675	M089--C9_075	Transcribed locus, strongly similar to NP_001002144.1 mediator complex subunit 22 [Danio rerio]
FM166816	373	M004--E2_007	gb|AAI33121.1| Manic fringe homolog [Danio rerio]
FM167576	288	M078--B6_046	ref|XP_001336572.1| PREDICTED: similar to GRIP1 associated protein 1 [Danio rerio]
FM167834	3166	M089--G8_052	gb|AAH92169.1| Pik3c3 protein [Danio rerio]
FM165980	3181	M089--F10_070	Transcribed locus, moderately similar to NP_001013283.2 pin2/trf1-interacting protein 1 [Danio rerio]
FM167220	753	M080--F10_070	ZPC domain containing protein 4
FM167487	2133	M078--A9_079	Transcribed locus, moderately similar to NP_001026734.1 cysteine-rich, angiogenic inducer, 61 [Gallus gallus]
FM169715	2414	M035--C6_044	gb|EDL92285.1| similar to TBC1 domain family, member 8 (with GRAM domain); vascular
FM167080	1404	M082--B5_045	Transcribed locus, weakly similar to XP_343460.3 PREDICTED: similar to RAB6B, member RAS oncogene family [Rattus norvegicus]
FM166489	378	M061--F11_085	ref|XP_699786.2| PREDICTED: similar to Receptor-type tyrosine-protein phosphatase S
FM169860	2938	M077--E5_039	ref|NP_001011696.1| transforming acidic coiled coil 1a [Takifugu rubripes]
FM167788	345	M085--B11_093	ref|NP_001077118.1| RasGEF domain family, member 1B [Bos taurus]
FM167540	348	M019--G7_051	ref|XP_001508024.1| PREDICTED: similar to Serine/threonine-protein kinase WNK2 (Protein
FM170693	1598	M074--A12_096	ref|XP_001336723.1| PREDICTED: similar to haploid germ cell-specific nuclear protein
FM165965	2562	M073--H2_002	Transcribed locus, moderately similar to XP_426466.2 PREDICTED: similar to MOK protein kinase [Gallus gallus]
FM166565	3496	M064--C4_028	Transformer 2a
FM169192	3132	M075--B4_030	gb|ABF22438.1| retinoic acid receptor gamma [Takifugu rubripes]
FM167344	865	m013--A10_080	Transcribed locus, moderately similar to NP_001026640.1 sno, strawberry notch homolog 1 [Gallus gallus]
FM172094	1888	M074--C1_011	Anti-mullerian hormone
FM165779	3164	M081--H2_002	ref|XP_419907.2| PREDICTED: similar to Leucine rich repeat containing 1 [Gallus
FM167500	1439	m008--H4_018	ref|XP_001365055.1| PREDICTED: similar to fc49b10 G-protein coupled receptor
FM166713	246	M080--G11_083	Transcribed locus, strongly similar to NP_001005827.1 Ras-related protein Rab-11A [Gallus gallus]
FM165864	2829	M079--H4_018	Transcribed locus, strongly similar to NP_001002242.1 casein kinase II alpha 1 subunit [Gallus gallus]
FM167606	2212	M081--E5_039	ref|XP_001504719.1| PREDICTED: similar to AMP-activated protein kinase gamma2 subunit
FM168912	2196	M018--A12_096	Transcribed locus, strongly similar to NP_001894.2 catenin, alpha 1 [Homo sapiens]
FM166988	2143	M091--B12_094	ref|XP_001339353.1| PREDICTED: similar to Bcl9-2 [Danio rerio]
FM166354	2272	M079--G11_083	emb|CAM13158.1| novel protein similar to vertebrate protein phosphatase 1D
FM170995	1520	M078--D3_025	gb|EDS27720.1| target of rapamycin [Culex pipiens quinquefasciatus]
FM167664	2256	M051--B5_045	ref|NP_001003837.2| protein-tyrosine kinase [Danio rerio]
FM166072	3550	M078--A11_095	ref|XP_414870.2| PREDICTED: similar to PACT [Gallus gallus]
FM166423	945	M079--D3_025	Transcribed locus, strongly similar to NP_001013385.3 protein kinase, AMP-activated, alpha 1 catalytic subunit [Mus musculus]
FM168549	758	m010--D6_042	Transcribed locus, strongly similar to NP_031640.1 catenin (cadherin associated protein), beta 1, 88kDa [Mus musculus]
FM166003	1906	M078--G1_003	emb|CAN88433.1| novel protein similar to vertebrate PDLIM1 interacting kinase 1
FM168611	400	M050--G11_083	gb|ABY83136.1| leukocyte tyrosine kinase [Danio rerio]
FM165885	2266	M074--D7_057	Transcribed locus, moderately similar to XP_418527.1 PREDICTED: similar to Oxsr1 protein [Gallus gallus]
FM168080	2571	M081--D3_025	ref|NP_001072726.1| multiple EGF-like-domains 10 [Xenopus tropicalis]
FM167484	3518	m007--D6_042	ref|XP_696465.2| PREDICTED: similar to chicken rabaptin-5 [Danio rerio]
FM167515	746	M064--D7_057	Transcribed locus, moderately similar to NP_989891.1 activin A receptor, type I [Gallus gallus]
FM166480	1484	M050--C4_028	Transcribed locus, strongly similar to XP_001343467.1 PREDICTED: similar to atypical protein kinase C zeta [Danio rerio]
FM166897	1300	M011--A10_080	ref|XP_684334.2| PREDICTED: similar to tuberin-like protein 1 [Danio rerio]
FM169405	1389	M058--A10_080	Transcribed locus, strongly similar to NP_001883.4 casein kinase 1, alpha 1 isoform 2 [Homo sapiens]
FM166067	1151	M024--H7_049	gb|ABC24690.1| follistatin like protein-1 [Salmo salar]
FM167756	1723	M051--D8_058	ref|XP_694996.2| PREDICTED: similar to multiple membrane spanning receptor TRC8
FM165815	3451	M061--D11_089	Luteinizing hormone receptor
FM168675	3241	M026--H5_033	Transcribed locus, strongly similar to NP_001002750.1 RAB30, member RAS oncogene family [Danio rerio]
FM170950	2019	m015--H4_018	Transcribed locus, moderately similar to NP_001073656.1 protein tyrosine phosphatase, mitochondrial 1 [Danio rerio]
FM167703	3341	M048--G2_004	ref|NP_001074847.1| kinase D-interacting substrate of 220 kDa [Mus musculus]
FM167724	3475	m015--D3_025	ref|NP_001027836.1| G protein-coupled receptor 135 [Takifugu rubripes]
FM169325	2524	M046--F1_005	Transcribed locus, moderately similar to NP_001026005.1 protein phosphatase methylesterase-1 [Gallus gallus]
FM167915	750	M046--F11_085	gb|ABU55371.1| transforming growth factor-beta [Carassius auratus]
FM166561	3332	M049--B6_046	Transcribed locus, moderately similar to NP_001026540.1 nuclear receptor co-repressor/HDAC3 complex subunit [Gallus gallus]
FM167430	2265	M069--B5_045	ref|NP_956207.1| mitogen-activated protein kinase kinase kinase kinase 5 [Danio
FM168040	3427	M055--C3_027	gb|AAP58738.1| C-type lectin receptor [Paralabidochromis chilotes]
FM168411	1190	M026--E1_007	gb|AAI33121.1| Manic fringe homolog [Danio rerio]
FM167128	2184	M045--B6_046	emb|CAI20734.1| novel protein similar to rat kinase D-interacting substance of 220
FM166792	950	M060--H5_033	emb|CAH69075.1| novel protein similar to vertebrate protein phosphatase 1, regulatory
FM171576	1566	M021--A1_015	ref|XP_001515412.1| PREDICTED: similar to KS5 protein [Ornithorhynchus anatinus]
FM167156	2442	M057--C6_044	Transcribed locus, strongly similar to NP_998022.1 osteoclast stimulating factor 1 [Danio rerio]
FM167338	647	M021--D6_042	Transcribed locus, weakly similar to NP_062253.1 stromal cell derived factor receptor 1 [Rattus norvegicus]
FM167290	3549	M049--D12_090	ref|XP_688868.2| PREDICTED: similar to active breakpoint cluster region-related
FM169739	3085	M065--G9_067	ref|NP_571258.1| nuclear receptor subfamily 2, group F, member 2 [Danio rerio]
FM169049	159	M020--G7_051	ref|XP_686241.1| PREDICTED: similar to G protein-coupled receptor 135 [Danio rerio]
FM170658	3176	M058--E5_039	Transcribed locus, moderately similar to NP_958873.2 calreticulin like [Danio rerio]
FM170038	1299	M056--F3_021	ref|NP_001038229.2| betacellulin, epidermal growth factor family member [Danio rerio]
FM169115	2051	m010--F10_070	Transcribed locus, strongly similar to NP_001017001.1 NMDA receptor regulated 1-like [Xenopus tropicalis]
FM165786	2377	M023--D1_009	ref|NP_997859.1| muskelin 1, intracellular mediator containing kelch motifs [Danio
FM166483	3242	M055--A9_079	sp|A5WW21|RASEF_DANRE RAS and EF-hand domain-containing protein
FM168095	3369	M068--G4_020	ref|NP_001012388.1| discs, large (Drosophila) homolog 1, like [Danio rerio]
FM167654	2660	M053--G6_036	Transformer 2b
FM166563	1680	M023--E5_039	emb|CAC44628.1| tyrosine protein kinase BTK [Takifugu rubripes]
FM167247	3361	M058--E7_055	ref|XP_684703.2| PREDICTED: similar to protein tyrosine phosphatase, receptor-type, Z
FM166324	1650	M056--H7_049	emb|CAP09397.1| novel protein similar to human and mouse Rho GTPase activating
FM169431	1419	M064--C3_027	Transcribed locus, weakly similar to XP_686890.2 PREDICTED: similar to IL6ST nirs [Danio rerio]
FM167299	2743	M022--F4_022	Estrogen receptor beta
FM167839	1367	M022--E7_055	Transcribed locus, moderately similar to XP_616212.3 PREDICTED: similar to protein tyrosine phosphatase, receptor type, M [Bos taurus]
FM167881	1211	M018--G6_036	Transcribed locus, weakly similar to XP_694656.2 PREDICTED: similar to leukocyte immune-type receptor 3 [Danio rerio]
FM170531	1443	M032--E3_023	gb|ABD90687.1| bone morphogenetic protein 1 [Danio rerio]
FM169943	52	M057--D7_057	Transcribed locus, weakly similar to XP_701836.2 PREDICTED: similar to Myelin protein zero-like 1 [Danio rerio]
FM168077	2100	M038--D3_025	Transcribed locus, weakly similar to NP_033086.1 regucalcin [Mus musculus]
FM170366	421	M028--E1_007	ref|NP_001106665.1| toll-like receptor adaptor molecule [Takifugu rubripes]
FM166030	1231	M038--H7_049	dbj|BAC65460.1| T cell receptor gamma chain [Paralichthys olivaceus]
FM168515	1686	M031--F11_085	ref|XP_001371050.1| PREDICTED: similar to mitogen-activated protein kinase binding
FM166302	849	M046--B1_013	ref|NP_001103480.1| plexin A1 [Danio rerio]
FM168126	1733	M039--E9_071	Transcribed locus, strongly similar to NP_033022.1 RAB1, member RAS oncogene family [Mus musculus]
FM170569	2488	M039--G8_052	ref|XP_001368590.1| PREDICTED: similar to tousled-like kinase 2, isoform 2 [Monodelphis
FM168180	2415	M032--C10_076	dbj|BAD23843.1| extracellular signal regulated protein kinase 2 [Cyprinus carpio]
FM169855	3620	M080--A9_079	gb|AAR25676.1| class I helical cytokine receptor member 13 [Tetraodon
FM168831	2391	M036--A4_032	gb|AAF28784.1| immune-type receptor 7 [Sphoeroides nephelus]
FM166025	408	M082--D9_073	ref|XP_001336723.1| PREDICTED: similar to haploid germ cell-specific nuclear protein
FM170301	3501	M034--G2_004	gb|ABO14980.1| CCL4-like chemokine [Salmo salar]
FM166651	3575	M053--C12_092	dbj|BAA20535.1| Notch 2 [Takifugu rubripes]
FM167517	177	M058--H4_018	ref|NP_001070084.1| RAN GTPase activating protein 1 [Danio rerio]
FM166404	1801	M033--B10_078	dbj|BAD06984.1| gamma-aminobutyric acid A receptor subunit rho 1 [Oreochromis
FM167468	1346	M039--E6_040	ref|XP_001345059.1| PREDICTED: similar to Actinin, alpha 4, partial [Danio rerio]
FM166977	3205	M036--A8_064	Transcribed locus, moderately similar to NP_957464.1 vaccinia related kinase 2 [Danio rerio]
FM166887	1977	M-034-A1_023	ref|XP_001337479.1| PREDICTED: similar to Ring finger protein 182 [Danio rerio]
FM166785	434	M036--H11_081	gb|AAR25692.1| class I helical cytokine receptor number 29 [Tetraodon nigroviridis]
FM168117	3420	M066--D5_041	ref|NP_571063.1| patched 1 [Danio rerio]
FM169480	449	M045--C8_060	Transcribed locus, moderately similar to NP_957098.1 mitochondria-associated granulocyte macrophage CSF signaling molecule [Danio rerio]
FM166733	940	M072--D5_041	ref|XP_001343426.1| PREDICTED: similar to Ste20 group protein kinase HGK [Danio rerio]
FM169050	2970	M072--E3_023	ref|NP_001011704.1| transforming acidic coiled coil 1b isoform A [Takifugu rubripes]
FM166081	2038	M044--F5_037	ref|XP_684056.2| PREDICTED: similar to Dyrk1a-prov protein [Danio rerio]
FM172275	1409	M028--D2_010	emb|CAM56489.1| novel protein similar to vertebrate thyroid hormone receptor
FM168346	798	m014--A1_015	ref|NP_001094186.1| Son of sevenless homolog 1 [Rattus norvegicus]
FM166180	1988	M045--A9_079	gb|ABQ13029.1| serine/threonine kinase 24 (STE20 homolog, yeast) [Bos taurus]
FM168223	2922	M070--E4_024	ref|XP_415829.2| PREDICTED: similar to TAO kinase 1 [Gallus gallus]
FM170815	3598	M028--F10_070	Transcribed locus, moderately similar to NP_957011.1 thyroid hormone receptor associated protein 6 [Danio rerio]
FM166551	3325	M042--A1_015	ref|XP_699814.2| PREDICTED: similar to A-kinase anchoring protein AKAP350 [Danio
FM170153	3464	M042--D3_025	Transcribed locus, strongly similar to NP_001025840.1 RAB35, member RAS oncogene family [Gallus gallus]
FM168678	1896	M030--C4_028	ref|XP_001505156.1| PREDICTED: similar to amyotrophic lateral sclerosis 2 (juvenile)
FM167684	920	M040--F3_021	Transcribed locus, strongly similar to XP_001332666.1 PREDICTED: similar to Phosphorylase b kinase regulatory subunit alpha, skeletal muscle isoform (Phosphorylase kinase alpha M subunit), partial [Danio rerio]
FM171748	521	M076--A11_095	Transcribed locus, strongly similar to NP_057614.1 RAB8B, member RAS oncogene family [Homo sapiens]
FM168272	3243	M031--C7_059	ref|NP_919383.1| MAP kinase-interacting serine/threonine kinase 2 [Danio rerio]
FM168167	69	M047--H2_002	Transcribed locus, moderately similar to NP_001008521.1 protein tyrosine kinase 9 [Rattus norvegicus]
FM166510	3503	M078--H2_002	Transcribed locus, moderately similar to NP_031640.1 catenin (cadherin associated protein), beta 1, 88kDa [Mus musculus]
FM165830	1208	M030--H3_017	emb|CAP19571.1| signal transducing adaptor molecule (SH3 domain and ITAM motif) 2
FM169173	3100	M062--C2_012	gb|ABE98248.1| mitogen-activated protein kinase kinase kinase 7 interacting
FM168960	3056	M042--G11_083	ref|YP_001129431.1| LANA [Human herpesvirus 8 type P]
FM167482	1502	M016--E11_087	OlGPCPR-gamma mRNA for G protein coupled progestin receptor gamma
FM171047	1364	M069--A5_047	pdb|2Z6H|A Chain A, Crystal Structure Of Beta-Catenin Armadillo Repeat Region
FM168924	919	M017--D10_074	ref|XP_001379385.1| PREDICTED: similar to Casein kinase 1, delta [Monodelphis
FM172344	1567	M048--E3_023	ref|XP_001515412.1| PREDICTED: similar to KS5 protein [Ornithorhynchus anatinus]
FM166456	999	M016--C6_044	Transcribed locus, moderately similar to NP_001032463.1 protein phosphatase 1, regulatory (inhibitor) subunit 7 [Danio rerio]
FM165879	3177	M067--E1_007	Transcribed locus, moderately similar to NP_031617.1 calreticulin [Mus musculus]
FM171040	3232	M067--D3_025	emb|CAM56491.1| opioid receptor, delta 1 [Danio rerio]
FM170832	3304	M064--E12_088	Transcribed locus, strongly similar to NP_001025951.1 RAB, member of RAS oncogene family-like 3 [Gallus gallus]
FM165876	2353	M064--D3_025	gb|AAI25958.1| Fancc protein [Danio rerio]
FM166840	1247	M081--A10_080	gb|EDP37037.1| T-cell receptor beta chain ANA 11, putative [Brugia malayi]
FM170779	566	M070--C11_091	ref|XP_701262.2| PREDICTED: similar to zona pellucida glycoprotein ZPB [Danio rerio]
FM169017	2174	M018--C8_060	ref|XP_001337829.1| PREDICTED: similar to proto-oncogene tyrosine-protein kinase isoform
FM167198	1993	M083--G7_051	Transcribed locus, strongly similar to NP_001006060.1 dual specificity phosphatase 14 [Danio rerio]
FM165812	3608	M017--D7_057	dbj|BAB16107.1| gonadotropin receptor II [Oreochromis niloticus]
FM167271	1217	M060--G5_035	Transcribed locus, strongly similar to XP_691370.1 PREDICTED: similar to PTC7 protein phosphatase homolog (S. cerevisiae) [Danio rerio]
FM167379	2325	M071--A2_016	Transcribed locus, strongly similar to NP_057661.3 RAB6B, member RAS oncogene family [Homo sapiens]
FM166246	2767	M071--A1_015	ref|NP_001104619.1| unc-5 homolog B [Danio rerio]
FM168456	2036	m014--H11_081	Transcribed locus, weakly similar to XP_001086694.1 PREDICTED: similar to steroid receptor RNA activator 1 [Macaca mulatta]
FM166038	3591	M070--B5_045	ref|XP_415955.2| PREDICTED: similar to SFRS protein kinase 2 [Gallus gallus]
FM167113	2715	M071--H8_050	ref|XP_001362732.1| PREDICTED: similar to FRS2 protein [Monodelphis domestica]
FM166899	1451	M071--E5_039	Transcribed locus, weakly similar to NP_001080354.1 EGF-like-domain, multiple 6 [Xenopus laevis]
FM168834	2259	M071--E3_023	gb|AAI42807.1| Ulk1 protein [Danio rerio]
FM166029	1549	M056--G9_067	dbj|BAA20535.1| Notch 2 [Takifugu rubripes]
FM169165	35	M068--C1_011	ref|NP_001018143.1| protein tyrosine phosphatase, receptor type, M [Danio rerio]
FM168668	1282	M068--B11_093	ref|NP_001098554.1| protein tyrosine phosphatase a [Oryzias latipes]
FM170203	970	M067--H3_017	gb|AAR12991.1| embryogenesis regulator [Carassius auratus gibelio]
FM169640	2956	M020--A11_095	Transcribed locus, strongly similar to NP_034105.1 casein kinase 2, beta polypeptide [Mus musculus]
FM165900	129	M070--A10_080	ref|XP_001506323.1| PREDICTED: similar to protein kinase C binding protein 1
FM169379	3155	M056--E3_023	Transcribed locus, strongly similar to NP_998515.1 ras homolog gene family, member Ac [Danio rerio]
FM165733	590	M078--F12_086	ref|XP_694979.2| PREDICTED: similar to kalirin, RhoGEF kinase, partial [Danio rerio]
FM167600	470	M056--B12_094	ref|XP_001362180.1| PREDICTED: similar to cAMP-specific cyclic nucleotide
FM170234	1001	M062--C7_059	Transcribed locus, strongly similar to NP_077779.2 protein phosphatase 3, regulatory subunit B, alpha isoform (calcineurin B, type I) [Mus musculus]
FM165802	3389	M050--F5_037	Transcribed locus, moderately similar to NP_957347.1 protein kinase C substrate 80K-H [Danio rerio]
FM168431	3130	M066--A5_047	Calmodulin
FM167140	1533	M045--B8_062	Transcribed locus, weakly similar to NP_840063.1 PX domain containing serine/threonine kinase short isoform [Mus musculus]
FM169650	3561	M017--A4_032	ref|XP_699690.2| PREDICTED: similar to ral guanine nucleotide dissociation
FM166189	1312	M063--A2_016	gb|ABR20510.1| transforming growth factor-beta receptor type I b [Danio rerio]
Metabolic enzymes (162)
FM168143	1383	M091--F3_021	Beta-3-glucoronyltransferase-S (b3gat2 gene)
FM170218	2349	M035--F3_021	Transcribed locus, moderately similar to XP_985993.2 PREDICTED: similar to D2hgdh protein [Mus musculus]
FM165788	2536	M087--D5_041	ref|ZP_01993114.1| beta-lactamase TEM [Vibrio parahaemolyticus AQ3810]
FM168676	1550	M060--E1_007	Glycinamide ribonucleotide synthetase-aminoimidazole ribonucleotide synthetase-glycinamide ribonucleotide transformylase
FM169999	3052	M091--F4_022	Transcribed locus, weakly similar to NP_149124.3 2',3'-cyclic nucleotide 3' phosphodiesterase [Homo sapiens]
FM166751	1045	M044--G2_004	gb|EAW61316.1| hCG19796, isoform CRA_c [Homo sapiens]
FM169064	2063	M085--H9_065	Transcribed locus, moderately similar to NP_942111.1 6-phosphofructo-2-kinase/fructose-2,6-biphosphatase 4 [Danio rerio]
FM166612	735	M092--E2_008	Transcribed locus, strongly similar to NP_038653.1 platelet-activating factor acetylhydrolase, isoform 1b, beta1 subunit [Mus musculus]
FM171223	309	M092--G8_052	gb|AAL89669.1|AF411956_10 hydroxymethylglutaryl-CoA lyase [Takifugu rubripes]
FM167863	3640	M063--D8_058	Transcribed locus, moderately similar to NP_001025241.1 glutathione peroxidase 4b [Danio rerio]
FM167064	3504	M073--G7_051	Transcribed locus, weakly similar to NP_998676.1 acetylserotonin O-methyltransferase-like [Danio rerio]
FM165723	1067	M043--G8_052	ref|NP_001018115.1| O-linked N-acetylglucosamine transferase isoform 2 [Danio rerio]
FM168186	2947	M035--D4_026	ref|NP_001008642.1| epoxide hydrolase 2, cytoplasmic [Danio rerio]
FM167661	657	m010--C6_044	Transcribed locus, moderately similar to NP_956228.1 vacuolar H+ ATPase G1 [Danio rerio]
FM165995	3537	M083--A3_031	Transcribed locus, moderately similar to NP_571958.1 prosaposin [Danio rerio]
FM172410	1829	M037--H11_081	Transcribed locus, moderately similar to NP_001029360.1 peptidylprolyl isomerase (cyclophilin)-like 1 [Rattus norvegicus]
FM166449	3151	M057--D9_073	ref|XP_697234.2| PREDICTED: similar to ADAM metallopeptidase with thrombospondin type
FM167170	3153	M088--E12_088	Transcribed locus, moderately similar to NP_001026405.1 5'-nucleotidase, cytosolic II [Gallus gallus]
FM167495	607	M089--C10_076	ref|NP_957208.1| abhydrolase domain containing 2 [Danio rerio]
FM169034	1116	M026--E7_055	Transcribed locus, moderately similar to NP_001028472.2 guanine monphosphate synthetase [Mus musculus]
FM168859	2189	M031--A6_048	Transcribed locus, moderately similar to NP_058674.1 ornithine aminotransferase [Mus musculus]
FM169153	3555	M038--A2_016	ref|XP_420317.2| PREDICTED: similar to Acyl-CoA synthetase [Gallus gallus]
FM169663	1374	M038--D8_058	ref|NP_955895.1| fumarylacetoacetate hydrolase (fumarylacetoacetase) [Danio rerio]
FM166257	3287	M089--C5_043	ref|NP_001007397.2| membrane bound O-acyltransferase domain containing [Danio rerio]
FM166784	2632	M035--B7_061	Transcribed locus, weakly similar to NP_956381.1 thioredoxin interacting protein [Danio rerio]
FM170463	187	M005--B10_078	Transcribed locus, moderately similar to NP_001101927.1 peptidylprolyl isomerase (cyclophilin)-like 4 [Rattus norvegicus]
FM166182	2698	M047--D8_058	gb|EAW78347.1| ATPase, Class VI, type 11B, isoform CRA_d [Homo sapiens]
FM169525	2159	M035--H7_049	Transcribed locus, moderately similar to NP_787022.1 NADH dehydrogenase (ubiquinone) 1 beta subcomplex, 2, 8kDa [Bos taurus]
FM168975	1540	M088--F6_038	Transcribed locus, moderately similar to NP_001007290.1 ribose 5-phosphate isomerase A (ribose 5-phosphate epimerase) [Danio rerio]
FM169354	3417	M003--G10_081	Transcribed locus, moderately similar to NP_001035020.1 glycosyltransferase 8 domain containing 2 [Danio rerio]
FM169357	2666	M090--E8_056	Transcribed locus, moderately similar to NP_001026507.1 leucine aminopeptidase [Gallus gallus]
FM165895	3456	M043--E8_056	Steroid-5-alpha-reductase alpha polypeptide 1
FM169981	2685	M043--D6_042	Transcribed locus, weakly similar to NP_001035181.1 autotaxin isoform 2 preproprotein [Homo sapiens]
FM166101	1155	M011--C8_060	Transcribed locus, moderately similar to NP_942570.1 acylpeptide hydrolase [Danio rerio]
FM172534	1561	M037--E2_008	Class III alcohol dehydrogenase
FM166031	1798	M041--C1_011	Transcribed locus, moderately similar to NP_957232.1 UDP-Gal:betaGlcNAc beta 1,4- galactosyltransferase, polypeptide 6 [Danio rerio]
FM167710	2313	M090--A8_064	Transcribed locus, strongly similar to NP_032733.1 N-myristoyltransferase 1 [Mus musculus]
FM166422	298	M037--E1_007	Transcribed locus, weakly similar to NP_001032655.1 threonine synthase-like 2 [Danio rerio]
FM171026	262	M023--B7_061	ref|NP_001027904.1| gp91phox protein [Takifugu rubripes]
FM171050	2140	M087--F11_085	Transcribed locus, moderately similar to NP_035017.1 NADH dehydrogenase (ubiquinone) Fe-S protein 4 [Mus musculus]
FM165758	1157	M051-G08-2_033	gb|AAR04057.1| sulfatase FP1b [Danio rerio]
FM167109	3393	M057--B9_077	ref|NP_001007054.1| phosphoglucomutase 3 [Danio rerio]
FM169039	1287	M056--H10_066	Transcribed locus, moderately similar to NP_990634.1 calpain 1, (mu/I) large subunit [Gallus gallus]
FM165982	1551	M060--C8_060	ref|XP_695172.2| PREDICTED: similar to ATPase, Ca++ transporting, type 2C, member 1,
FM170359	3422	M061--F12_086	ref|XP_691464.2| PREDICTED: similar to carboxypeptidase D [Danio rerio]
FM169547	1463	M066--E4_024	Transcribed locus, moderately similar to NP_037191.1 alkaline phosphatase, tissue-nonspecific [Rattus norvegicus]
FM166686	2214	M066--D6_042	gb|AAT81416.1| calpain 1 catalytic subunit [Oncorhynchus mykiss]
FM166807	1819	M040--G1_003	Transcribed locus, moderately similar to NP_059015.1 protein disulfide isomerase associated 3 [Rattus norvegicus]
FM169840	341	M067--A8_064	Transcribed locus, strongly similar to NP_031531.1 ATP synthase, H+ transporting, mitochondrial F1 complex, alpha subunit, isoform 1 [Mus musculus]
FM169549	2101	M071--D10_074	Transcribed locus, moderately similar to NP_059982.2 rTS beta protein [Homo sapiens]
FM167507	3440	M051--A8_064	Transcribed locus, moderately similar to XP_001341975.1 PREDICTED: similar to Propionyl-Coenzyme A carboxylase, alpha polypeptide [Danio rerio]
FM169998	1408	M071--D4_026	dbj|BAF94024.1| V-ATPase subunit A [Oreochromis mossambicus]
FM168420	3190	M050--H8_050	Transcribed locus, moderately similar to NP_571746.1 ATPase, Na+/K+ transporting, beta 1b polypeptide [Danio rerio]
FM166287	2752	M071--E11_087	Transcribed locus, moderately similar to NP_001026008.1 ribonucleoside-diphosphate reductase M1 chain [Gallus gallus]
FM168449	2274	M040--A11_095	Transcribed locus, moderately similar to NP_001025714.1 electron transfer flavoprotein, alpha polypeptide [Gallus gallus]
FM169315	616	m010--G3_019	Transcribed locus, weakly similar to NP_571202.1 lipoprotein lipase [Danio rerio]
FM168520	3316	M070--D2_010	Transcribed locus, strongly similar to NP_739823.1 NADH dehydrogenase subunit 4L [Oryzias latipes]
FM166375	452	M065--D4_026	Transcribed locus, strongly similar to NP_848930.1 ADP-ribosylation factor-like 8 [Homo sapiens]
FM166658	1808	M021--D4_026	gb|AAU44617.1| catalase [Oplegnathus fasciatus]
FM167526	3507	M055--C5_043	gb|AAH92711.1| Ferrochelatase [Danio rerio]
FM167347	583	M065--D9_073	Transcribed locus, moderately similar to NP_001025426.1 protein geranylgeranyltransferase type I, beta subunit [Danio rerio]
FM166424	1433	M056--C8_060	Transcribed locus, weakly similar to NP_956381.1 thioredoxin interacting protein [Danio rerio]
FM170627	44	M056--F4_022	sp|Q5RDX4|ATAD2_PONPY ATPase family AAA domain-containing protein 2
FM165781	382	M055--E6_040	ref|NP_001015068.1| signal peptide peptidase 3 [Danio rerio]
FM168599	2238	M063--G5_035	Furin endoprotease
FM167931	876	M066--D3_025	emb|CAD43419.1| SI:bZ30I22.3 (novel protein similar to vertebrate UDP-galactose
FM169447	1347	M063--F11_085	ref|XP_001331862.1| PREDICTED: similar to ATPase, Class V, type 10A, [Danio rerio]
FM170349	3098	M054--B11_093	Transcribed locus, weakly similar to XP_001339976.1 PREDICTED: similar to NADH dehydrogenase (ubiquinone) 1 alpha subcomplex 12, like [Danio rerio]
FM166724	2080	M071--E10_072	ref|NP_001002700.1| fatty acid amide hydrolase 2a [Danio rerio]
FM166385	1434	M068--F9_069	Transcribed locus, moderately similar to NP_955872.1 NADH dehydrogenase (ubiquinone) 1 alpha subcomplex, 10 [Danio rerio]
FM169362	1022	M048--B7_061	Transcribed locus, strongly similar to NP_032973.1 protease (prosome, macropain) 26S subunit, ATPase 1 [Mus musculus]
FM165979	270	m014--G10_068	emb|CAM13117.1| novel protein similar to vertebrate ATPase, H+ transporting,
FM167025	2443	M080--G1_003	Transcribed locus, moderately similar to NP_998760.1 iron-sulfur cluster assembly enzyme isoform ISCU2 precursor [Homo sapiens]
FM166904	2756	M058--A2_016	Transcribed locus, moderately similar to NP_991208.1 phosphatidylinositol glycan anchor biosynthesis, class F [Danio rerio]
FM166333	2042	M076--H9_065	dbj|BAC44871.1| methylcrotonoyl-Coenzyme A carboxylase 1 (alpha) [Pagrus major]
FM167887	3010	M034--D10_074	ref|XP_685041.2| PREDICTED: similar to ligase I [Danio rerio]
FM165716	2537	M047--B3_029	gb|ABP57022.1| beta lactamase [Cloning vector pTrueBlue]
FM165806	2533	M075--E3_023	gb|ABP57022.1| beta lactamase [Cloning vector pTrueBlue]
FM165927	1476	M087--F8_054	Transcribed locus, moderately similar to NP_001008475.1 peptidylprolyl isomerase (cyclophilin)-like 3 [Gallus gallus]
FM168251	1006	M075--G10_068	emb|CAA23015.1| topoisomerase I alpha [Takifugu rubripes]
FM167390	629	M047--D9_073	gb|ABC72122.1| myeloperoxidase [Siniperca chuatsi]
FM167045	892	M046--B6_046	Cytochrome P-450 17alpha-hydroxylase/C17,20-lyase
FM165811	3589	M046--C4_028	Transcribed locus, moderately similar to NP_001002359.1 saccharopine dehydrogenase a [Danio rerio]
FM167752	3131	M039--A8_064	Transcribed locus, moderately similar to NP_001017640.1 aldo-keto reductase family 1, member A1 [Danio rerio]
FM171114	3406	M055--D12_090	ref|XP_698710.1| PREDICTED: similar to plasticity-related protein PRG-2 [Danio
FM170606	681	M072--F9_069	emb|CAN88378.1| novel protein containing a tubulin-tyrosine ligase family domain
FM166778	2574	m006--C12_087	Caspase 3B
FM167096	2283	M079--G10_068	ref|XP_683917.2| PREDICTED: similar to Acetyl-CoA carboxylase (ACC) isoform 1 [Danio
FM165999	1149	M073--E8_056	Transcribed locus, moderately similar to XP_419732.1 PREDICTED: similar to aldehyde dehydrogenase 8A1 isoform 2 [Gallus gallus]
FM168998	2671	M057--E9_071	Transcribed locus, moderately similar to NP_955981.1 transaldolase 1 [Danio rerio]
FM166803	282	M073--D11_089	gb|ABE98244.1| mitochondrial isocitrate dehydrogenase 2-like [Oreochromis
FM166451	148	M079--B7_061	sp|Q5NDE3|AGO61_TETNG Uncharacterized glycosyltransferase AGO61 precursor
FM171850	571	M051--G9_067	Transcribed locus, moderately similar to XP_682908.2 PREDICTED: 5-aminoimidazole-4-carboxamide ribonucleotide formyltransferase/IMP cyclohydrolase [Danio rerio]
FM166363	2089	M071--G1_003	Transcribed locus, moderately similar to NP_957114.1 ubiquinol-cytochrome c reductase core I protein [Danio rerio]
FM166508	591	M054--H11_081	Transcribed locus, moderately similar to NP_001026603.1 UDP-N-acetylglucosamine-2-epimerase/N-acetylmannosamine kinase [Gallus gallus]
FM167381	86	M049--G2_004	Transcribed locus, moderately similar to NP_001004004.1 succinate dehydrogenase complex, subunit D, integral membrane protein [Danio rerio]
FM165711	2539	M046--D11_089	gb|AAD28611.1| beta-lactamase [Cloning vector pWD42-09]
FM166281	2704	M060--G9_067	Transcribed locus, weakly similar to XP_001340917.1 PREDICTED: similar to gag-protease [Danio rerio]
FM168607	29	M036--G2_004	ref|XP_001496028.1| PREDICTED: similar to TRF1-interacting ankyrin-related ADP-ribose
FM167183	2244	M058--B12_094	Transcribed locus, moderately similar to NP_001003488.1 pyruvate kinase, muscle, b [Danio rerio]
FM166915	2494	M074--C3_027	Transcribed locus, strongly similar to XP_001334945.1 PREDICTED: similar to Glutamate-ammonia ligase (glutamine synthase) a isoform 2 [Danio rerio]
FM170355	106	M031--G9_067	Alpha-2,3-sialyltransferase ST3Gal III
FM165707	2532	M030--A7_063	emb|CAL26907.1| beta-lactamase protein [Acetobacter pasteurianus]
FM170986	825	M057--H9_065	ref|XP_001121777.1| PREDICTED: similar to spermidine/spermine N1-acetyl
FM168551	1481	M033--H5_033	Transcribed locus, strongly similar to NP_001025772.1 inosine monophosphate dehydrogenase 2 [Gallus gallus]
FM167326	365	M018--C3_027	ref|NP_955922.1| LAG1 longevity assurance homolog 5 [Danio rerio]
FM166092	1272	M032--H11_081	Transcribed locus, moderately similar to NP_001026514.1 tyrosine 3-monooxygenase/tryptophan 5-monooxygenase activation protein, zeta polypeptide [Gallus gallus]
FM166040	2116	M053--B9_077	sp|Q5PRA2|DHTK1_DANRE Probable 2-oxoglutarate dehydrogenase E1 component DHKTD1,
FM166657	3363	m008--H10_066	gb|EDL79553.1| diacylglycerol kinase zeta, isoform CRA_b [Rattus norvegicus]
FM167793	2330	M020--E3_023	Transcribed locus, weakly similar to XP_422008.1 PREDICTED: similar to CARS-Cyp [Gallus gallus]
FM169004	3527	M051--A3_031	ref|NP_989227.1| transketolase [Xenopus tropicalis]
FM168698	1391	M005--H7_049	Transcribed locus, strongly similar to NP_031502.1 ADP-ribosylation factor 1 [Mus musculus]
FM167496	2215	M079--F8_054	sp|Q5RDX4|ATAD2_PONPY ATPase family AAA domain-containing protein 2
FM170061	1265	M033--A12_096	Transcribed locus, moderately similar to NP_001017560.1 glycosyltransferase-like domain containing 1 [Danio rerio]
FM170738	451	M016--D6_042	Transcribed locus, strongly similar to NP_031504.1 ADP-ribosylation factor 3 [Mus musculus]
FM166901	1996	M020--D12_090	Cytochrome P450 11beta
FM167742	3514	M069--A11_095	Transcribed locus, moderately similar to NP_001012498.1 betaine-homocysteine methyltransferase [Danio rerio]
FM166690	6	M029--E9_071	ref|NP_957189.1| phosphoserine aminotransferase 1 isoform 2 [Danio rerio]
FM167777	2134	M059--D8_058	Transcribed locus, weakly similar to XP_001342384.1 PREDICTED: similar to ovulatory protein-2 [Danio rerio]
FM169765	1198	M058--E2_008	Transcribed locus, moderately similar to NP_955893.1 hydroxysteroid dehydrogenase like 2 [Danio rerio]
FM167104	3228	M086--H8_050	Transcribed locus, moderately similar to NP_997786.1 UDP-N-acteylglucosamine pyrophosphorylase 1 [Danio rerio]
FM171490	1271	m015--A12_096	Transcribed locus, strongly similar to NP_062250.1 tyrosine 3-monooxgenase/tryptophan 5-monooxgenase activation protein, beta polypeptide [Rattus norvegicus]
FM165977	2996	M049--C4_028	emb|CAA23015.1| topoisomerase I alpha [Takifugu rubripes]
FM168838	2027	M019--D9_073	Transcribed locus, strongly similar to NP_001002526.1 ATPase, H+ transporting, V1 subunit F [Danio rerio]
FM169545	3335	M028--G9_067	gb|AAI55125.1| Arl6ip2 protein [Danio rerio]
FM172147	794	M024--F11_085	ref|XP_001363016.1| PREDICTED: similar to glycogenin 2, [Monodelphis domestica]
FM168818	1317	M067--A10_080	Transcribed locus, moderately similar to XP_693495.1 PREDICTED: similar to Calpain 1, (mu/I) large subunit [Danio rerio]
FM169323	1034	M028--F7_053	sp|Q4KML2|CRYD_BRARE Cryptochrome DASH (Protein CRY-DASH) (zCRY-DASH)
FM169515	1580	M072--H10_066	Transcribed locus, moderately similar to NP_035870.1 tyrosine 3-monooxygenase/tryptophan 5-monooxygenase activation protein, zeta polypeptide [Mus musculus]
FM167587	651	M020--D9_073	ref|NP_997878.1| YTH domain family, member 1 [Danio rerio]
FM166983	499	m008--B11_093	Transcribed locus, strongly similar to XP_001515885.1 PREDICTED: similar to Processing of precursor 7, ribonuclease P subunit (S. cerevisiae), partial [Ornithorhynchus anatinus]
FM168772	2303	M017--H11_081	Transcribed locus, moderately similar to NP_001017639.1 dCMP deaminase [Danio rerio]
FM166117	2085	M019--C6_044	Transcribed locus, moderately similar to NP_001026710.1 elongation of very long chain fatty acids-like 6 [Gallus gallus]
FM170612	530	M024--G1_003	Transcribed locus, moderately similar to NP_001026514.1 tyrosine 3-monooxygenase/tryptophan 5-monooxygenase activation protein, zeta polypeptide [Gallus gallus]
FM167709	1772	M025--C9_075	Transcribed locus, moderately similar to NP_001003523.1 succinate dehydrogenase complex, subunit C, integral membrane protein [Danio rerio]
FM166284	665	M092--A6_048	Transcribed locus, strongly similar to NP_001098207.1 astacin like metallo-protease [Oryzias latipes]
FM171183	3401	M092--F10_070	Transcribed locus, moderately similar to NP_956996.1 ATP synthase, H+ transporting, mitochondrial F0 complex, subunit d [Danio rerio]
FM167311	3408	m009--B4_030	Transcribed locus, moderately similar to NP_056338.1 small fragment nuclease [Homo sapiens]
FM170285	1205	m010--G11_083	Transcribed locus, strongly similar to XP_686056.2 PREDICTED: similar to diacylglycerol kinase epsilon DGK [Danio rerio]
FM169277	1982	M034--B7_061	Transcribed locus, strongly similar to NP_055580.1 translocase of outer mitochondrial membrane 20 homolog [Homo sapiens]
FM170049	1957	M039--B8_062	20-beta-hydroxysteroid dehydrogenase
FM170651	3509	J-.46_058	dbj|BAB60722.1| Na,K-ATPase alpha subunit 3 [Carassius auratus]
FM165721	2538	M050--E3_023	gb|ABP57022.1| beta lactamase [Cloning vector pTrueBlue]
FM165787	1199	M026--C10_076	Transcribed locus, moderately similar to NP_001038508.1 malonyl CoA:ACP acyltransferase (mitochondrial) [Danio rerio]
FM166649	3593	M034--F9_069	gb|AAC98961.1| cytochrome P450 [Dicentrarchus labrax]
FM166879	2604	M028--A4_032	ref|NP_001098266.1| alcohol dehydrogenase Class VI [Oryzias latipes]
FM167413	1658	m006--A12_086	ref|NP_001073506.1| N-ATPase [Danio rerio]
FM169559	1953	M041--A9_079	ref|XP_691235.1| PREDICTED: similar to heparan N-deacetylase/N-sulfotransferase-2
FM166584	875	M038--B3_029	Alpha 2,6 sialyltransferase I
FM166022	1388	M022--H5_033	Transcribed locus, weakly similar to XP_697618.2 PREDICTED: similar to Ntd5 protein [Danio rerio]
FM172608	2347	M075--F7_053	Protein O-fucosyltransferase 2
FM166958	3471	M033--G7_051	Alpha 2,6 sialyltransferase II
FM167059	900	M043--G2_004	ref|NP_998590.1| 1-acylglycerol-3-phosphate O-acyltransferase 3 [Danio rerio]
FM167562	1541	M074--D2_010	Beta1,4-galactosyltransferase 7
FM166390	3353	M053--E8_056	Transcribed locus, strongly similar to NP_001009694.1 ribose-phosphate pyrophosphokinase I -like [Rattus norvegicus]
FM168462	1103	M023--E7_055	Transcribed locus, strongly similar to XP_001340243.1 PREDICTED: similar to Uxs1 protein [Danio rerio]
FM166471	2298	J-.75_081	ref|XP_001343287.1| PREDICTED: similar to gag-protease [Danio rerio]
FM167363	2422	M047--C10_076	gb|ABC72121.1| p47phox [Siniperca chuatsi]
FM166923	1100	M004--D6_047	Transcribed locus, moderately similar to NP_001070706.1 signal peptide peptidase-like 2B isoform 3 [Homo sapiens]
FM165799	3079	M068--E12_088	gb|AAC53709.1| beta-galactosidase alpha peptide [Cloning vector pBin19]
FM170764	2560	M060--G6_036	ref|NP_001007119.1| helentron 4 helitron-like transposon replicase/helicase/endonuclease
FM169069	281	M003--B12_094	Transcribed locus, strongly similar to NP_958907.1 isocitrate dehydrogenase 1 (NADP+), soluble [Danio rerio]
Transcription Regulation (94)
FM169622	3469	M043--C9_075	Transcribed locus, weakly similar to XP_001501503.1 PREDICTED: similar to LIM homeobox protein 6 [Equus caballus]
FM167093	2725	M054--B2_014	ref|NP_001027861.1| B lymphocyte induced maturation protein 1 [Takifugu rubripes]
FM166468	275	M028--D9_073	ref|NP_001101730.1| bromodomain adjacent to zinc finger domain, 2B [Rattus norvegicus]
FM166236	1406	M073--D5_041	ref|XP_001520506.1| PREDICTED: similar to MAX dimerization protein 5, partial
FM166672	1568	M074--B4_030	Transcribed locus, moderately similar to NP_766526.2 sex comb on midleg-like 4 [Mus musculus]
FM169792	2010	M090--C8_060	ref|XP_416306.2| PREDICTED: similar to winged-helix transcription factor RFX4 [Gallus
FM166032	542	M083--D12_090	gb|EDL05218.1| zinc finger homeodomain 4 [Mus musculus]
FM168990	2759	M068--A8_064	Transcribed locus, moderately similar to NP_033573.1 zinc finger protein 161 [Mus musculus]
FM166802	1752	M042--E6_040	ref|NP_998431.1| helicase with zinc-finger domain [Danio rerio]
FM167199	2334	M073--F3_021	ref|XP_694898.2| PREDICTED: similar to transcription factor PAX7C [Danio rerio]
FM169666	2854	M089--C6_044	Transcribed locus, moderately similar to NP_571748.1 transcription elongation regulator foggy [Danio rerio]
FM168825	1883	M068--A1_015	ref|XP_693458.2| PREDICTED: similar to novel zinc finger protein [Danio rerio]
FM171217	1432	M065--A5_047	emb|CAM15133.1| zinc finger, MYND domain containing 19 [Danio rerio]
FM167898	2416	M046--F2_006	Transcribed locus, moderately similar to NP_005517.1 heat shock transcription factor 1 [Homo sapiens]
FM169953	3095	M087--F4_022	ref|XP_342841.3| PREDICTED: similar to zinc finger protein 462 [Rattus norvegicus]
FM169400	2668	M074--F1_005	ref|XP_001345929.1| PREDICTED: similar to PDZ and LIM domain 7, partial [Danio rerio]
FM166999	3430	m014--C9_075	Transcribed locus, weakly similar to XP_860629.1 PREDICTED: similar to General transcription factor 3C polypeptide 1 (Transcription factor IIIC-alpha subunit) (TF3C-alpha) (TFIIIC 220 kDa subunit) (TFIIIC220) (TFIIIC box B-binding subunit) isoform 5 [Cani
FM168580	1517	M048--B3_029	Transcribed locus, moderately similar to NP_001027464.1 zinc finger protein 207 isoform b [Homo sapiens]
FM170321	1652	M047--E12_088	dbj|BAE44277.1| hoxC3a [Oryzias latipes]
FM169117	1900	M066--F8_054	Transcribed locus, weakly similar to NP_001029081.1 E74-like factor 2 isoform 1 [Rattus norvegicus]
FM166582	2186	M074--F7_053	ref|NP_001008650.1| zinc finger, DHHC-type containing 13 [Danio rerio]
FM167868	3450	m013--A7_063	ref|XP_001507190.1| PREDICTED: similar to zinc finger transcription factor TRPS1
FM167380	1663	M021--A9_079	ref|XP_698607.2| PREDICTED: similar to MAX dimerization protein 1 [Danio rerio]
FM166330	254	M004--G8_065	Transcribed locus, moderately similar to NP_956893.1 CXXC finger 1, like [Danio rerio]
FM167180	3108	M004--G12_097	Transcribed locus, moderately similar to NP_001026094.1 TBP-associated factor 8 [Gallus gallus]
FM166061	3068	M063--A11_095	ref|XP_686862.2| PREDICTED: similar to transcriptional regulatory protein [Danio
FM169060	567	m012--G3_019	ref|XP_688126.2| PREDICTED: similar to E2F transcription factor 3 [Danio rerio]
FM166109	457	M046--A11_095	Transcribed locus, strongly similar to NP_956627.1 CXXC finger 1 (PHD domain) [Danio rerio]
FM168191	1693	M072--D9_073	ref|XP_696757.2| PREDICTED: similar to Mbt domain containing 1 [Danio rerio]
FM169006	769	M032--H6_034	Transcribed locus, moderately similar to NP_956023.1 general transcription factor IIF, polypeptide 1 [Danio rerio]
FM166021	3127	M054--A2_016	Transcribed locus, strongly similar to XP_700052.2 PREDICTED: similar to forkhead box protein FoxN3a [Danio rerio]
FM166636	2658	M018--B9_077	ref|XP_001234571.1| PREDICTED: similar to cofactor required for Sp1 transcriptional
FM165743	1163	M078--E12_088	Transcribed locus, strongly similar to NP_001006280.1 cofactor required for Sp1 transcriptional activation, subunit 6, 77kDa [Gallus gallus]
FM170353	1030	M060--C5_043	Transcribed locus, weakly similar to NP_957243.1 zinc finger, AN1-type domain 5b [Danio rerio]
FM167536	1611	M078--B10_078	ref|NP_991270.1| polyhomeotic Ph1 homolog [Danio rerio]
FM169147	2777	M056--B2_014	ref|XP_422861.2| PREDICTED: similar to GON4L [Gallus gallus]
FM169874	2727	M035--D3_025	Transcribed locus, strongly similar to NP_524630.1 pleiohomeotic CG17743-PA, isoform A [Drosophila melanogaster]
FM167039	2045	M092--F6_038	ref|NP_998596.1| histone deacetylase 8 [Danio rerio]
FM167207	3236	M035--D11_089	gb|ABI94729.1| Smad3 [Ctenopharyngodon idella]
FM167615	1814	M085--E10_072	Transcribed locus, weakly similar to NP_001081631.1 Xsox17-alpha protein [Xenopus laevis]
FM169581	1528	M070--E8_056	Transcribed locus, strongly similar to XP_001496246.1 PREDICTED: similar to dachshund protein [Equus caballus]
FM167167	2091	M091--A10_080	Transcribed locus, moderately similar to NP_004562.2 PBX/knotted 1 homeobox 1 [Homo sapiens]
FM169005	87	M060--F7_053	BHLH protein DEC1b
FM168897	2853	M079--F4_022	ref|XP_001093002.1| PREDICTED: similar to general transcription factor IIIC, polypeptide
FM166351	2376	M059--F6_038	Transcribed locus, weakly similar to NP_808352.1 zinc finger protein 637 [Mus musculus]
FM165923	1053	M090--F1_005	Transcribed locus, moderately similar to XP_001341419.1 PREDICTED: similar to CBP/p300-interacting transactivator isoform 2 [Danio rerio]
FM166900	297	M039--E5_039	Transcribed locus, moderately similar to XP_001520527.1 PREDICTED: similar to sensory organ homeobox-1, partial [Ornithorhynchus anatinus]
FM169854	1688	M004--A5_034	ref|NP_997800.1| MYST histone acetyltransferase 2 [Danio rerio]
FM172478	343	M031--D9_073	ref|NP_001076410.1| zinc finger, BED domain containing 4 [Danio rerio]
FM168147	743	m013--E3_023	Transcribed locus, weakly similar to NP_956524.1 ankyrin repeat, SAM and basic leucine zipper domain containing 1 [Danio rerio]
FM166846	2724	M068--H3_017	ref|XP_696624.1| PREDICTED: zinc finger protein 513 [Danio rerio]
FM168584	1004	M032--F12_086	gb|AAY85293.1| CBP-A [Danio rerio]
FM166570	2466	M039--C8_060	Transcribed locus, moderately similar to NP_956017.1 activating transcription factor 1 [Danio rerio]
FM166587	1547	M057--E1_007	Dmrt1-B (Dmrt1) mRNA, partial cds, alternatively spliced
FM169166	1653	M091--B4_030	Diencephalon/mesencephalon homeobox 1 isoform Mbx-L
FM168137	856	M090--G4_020	ref|XP_001490944.1| PREDICTED: similar to bromodomain adjacent to zinc finger domain, 1A
FM169592	977	M090--H2_002	emb|CAN88231.1| novel protein similar to human and mouse zinc finger, FYVE domain
FM170277	1678	M090--H4_018	sp|Q9C0B9|ZCHC2_HUMAN Zinc finger CCHC domain-containing protein 2
FM172571	1440	M072--B3_029	Transcribed locus, moderately similar to NP_739570.1 HNF1 homeobox a [Danio rerio]
FM167707	2723	M021--F5_037	ref|XP_696624.1| PREDICTED: zinc finger protein 513 [Danio rerio]
FM171001	3482	M051--H2_002	Transcribed locus, moderately similar to XP_001340461.1 PREDICTED: similar to Leucine zipper transcription factor-like 1, partial [Danio rerio]
FM166894	2401	M024--H6_034	Transcribed locus, moderately similar to NP_956967.1 zinc finger protein [Danio rerio]
FM169310	1640	M051--B2_014	Transcribed locus, moderately similar to NP_001004572.1 histone acetyltransferase 1 [Danio rerio]
FM170497	2004	M053--E2_008	Transcription factor GATA-2
FM167686	2942	M031--D2_010	Transcribed locus, weakly similar to NP_998398.1 activating transcription factor 4 [Danio rerio]
FM166181	1444	M024--D2_010	Transcribed locus, strongly similar to NP_001006226.1 putative homeodomain transcription factor 2 [Gallus gallus]
FM168509	1597	M025--D12_090	emb|CAI20806.1| novel zinc finger protein [Danio rerio]
FM170544	1830	M065--G7_051	Hoxc4a protein
FM167378	2044	m007--H4_018	gb|AAC34383.1| All-1 related protein [Takifugu rubripes]
FM166871	3279	M061--E3_023	Transcribed locus, weakly similar to NP_898869.1 zinc finger, MYND-type containing 8 isoform c [Homo sapiens]
FM169317	2182	M065--G10_068	ref|XP_593090.2| PREDICTED: similar to mothers against decapentaplegic-like 9
FM170236	3606	M004--C10_071	Transcribed locus, moderately similar to NP_777589.2 zinc finger, MIZ-type containing 2 isoform 2 [Homo sapiens]
FM172495	1804	M022--D4_026	ref|XP_001332318.1| PREDICTED: similar to Forkhead box M1-like [Danio rerio]
FM167918	861	M056--B6_046	ref|XP_001492530.1| PREDICTED: similar to Zinc finger SWIM domain-containing protein 6
FM167924	2773	M087--A8_064	ref|NP_776943.1| Cbp/p300-interacting transactivator, with Glu/Asp-rich
FM166355	869	M057--D11_089	Chromobox homolog 2
FM167134	639	M011--E12_088	emb|CAK04992.2| novel protein similar to vertebrate ash1 (absent, small, or
FM167255	1823	M021--G10_068	Transcribed locus, strongly similar to NP_001020580.1 histone deacetylase 1 [Rattus norvegicus]
FM166393	2761	M054--H4_018	Transcribed locus, weakly similar to NP_001023148.1 ForKHead transcription factor family member (fkh-7) [Caenorhabditis elegans]
FM166982	2830	M075--H5_033	gb|EDL05218.1| zinc finger homeodomain 4 [Mus musculus]
FM166940	1534	m015--C9_075	Transcribed locus, moderately similar to NP_957115.1 transcription factor AP-2 epsilon [Danio rerio]
FM169243	2171	m012--A11_095	ref|NP_001073649.1| zinc finger protein 148 [Danio rerio]
FM166235	1119	M055--D7_057	Transcribed locus, moderately similar to NP_005739.2 YY1 associated factor 2 [Homo sapiens]
FM168275	1460	M049--G5_035	ref|XP_873277.2| PREDICTED: similar to zinc finger protein 262 isoform 2 [Bos taurus]
FM166591	740	M085--E12_088	Transcribed locus, moderately similar to XP_001495649.1 PREDICTED: similar to ALR-like protein [Equus caballus]
FM167259	3240	M058--E6_040	Transcribed locus, strongly similar to NP_034541.2 histone deacetylase 3 [Mus musculus]
FM166917	2346	M026--E3_023	gb|ABS70779.1| nuclear factor erythroid derived 2-like 1 [Astatotilapia burtoni]
FM166513	2065	M049--C9_075	Transcribed locus, moderately similar to XP_001332863.1 PREDICTED: similar to High-mobility group box 2 [Danio rerio]
FM165738	1962	M057--G10_068	ref|NP_001073420.1| CCR4-NOT transcription complex, subunit 1 [Danio rerio]
FM166380	1521	M048--G7_051	gb|AAH77168.1| Tsc22d2 protein [Danio rerio]
FM166144	356	M063--C1_011	Transcribed locus, weakly similar to XP_913495.3 PREDICTED: similar to Zfp93 protein [Mus musculus]
FM167668	1731	M062--E8_056	Transcribed locus, moderately similar to NP_001073432.1 vascular endothelial zinc finger 1 [Danio rerio]
FM166574	3356	M091--E11_087	ref|NP_571646.1| MAD homolog 3a [Danio rerio]
FM167201	1146	M023--B3_029	ref|XP_001489630.1| PREDICTED: similar to zinc finger, RAN-binding domain containing 1
DNA biosynthesis, structure and stability maintenance (63)
FM167558	3146	M039--H10_066	gb|AAD19348.1| reverse transcriptase-like protein [Takifugu rubripes]
FM167646	3334	M039--E2_008	ref|YP_524589.1| histone protein [Rhodoferax ferrireducens T118]
FM172379	3303	M004--A8_054	ref|XP_796769.2| PREDICTED: similar to endonuclease-reverse transcriptase
FM167815	3281	m006--C9_067	ref|XP_001502360.1| PREDICTED: similar to DNA polymerase zeta catalytic subunit [Equus
FM170200	1269	m010--E5_039	Transcribed locus, moderately similar to NP_037406.1 polymerase (DNA directed), lambda [Homo sapiens]
FM166769	2345	M026--F6_038	ref|XP_001188792.1| PREDICTED: similar to transposase [Strongylocentrotus purpuratus]
FM170070	1356	M041--C8_060	Transcribed locus, moderately similar to NP_956765.1 xeroderma pigmentosum, complementation group A [Danio rerio]
FM166216	765	m010--E1_007	ref|XP_692568.2| PREDICTED: similar to centrosome-associated protein 350 [Danio
FM170128	1209	M023--E4_024	Transcribed locus, weakly similar to NP_001036234.1 polymerase (DNA-directed), delta 3 [Danio rerio]
FM169596	2070	M065--A3_031	Transcribed locus, strongly similar to NP_997737.1 histocompatibility 13 [Danio rerio]
FM166093	954	M089--A7_063	Transcribed locus, weakly similar to NP_998531.1 bromodomain containing 7 [Danio rerio]
FM169579	2458	M022--G9_067	Transcribed locus, moderately similar to NP_001026700.1 chromatin modifying protein 6 [Gallus gallus]
FM169199	2222	M082--F1_005	Transcribed locus, moderately similar to NP_001103994.1 bromodomain containing 2b [Danio rerio]
FM166788	978	M085--E7_055	ref|XP_001369697.1| PREDICTED: similar to single-stranded DNA binding protein 2,
FM166696	1072	M078--G3_019	ref|XP_001373823.1| PREDICTED: similar to Ligase III, DNA, ATP-dependent [Monodelphis
FM167574	2978	M070--F12_086	Transcribed locus, moderately similar to NP_001020581.1 chromatin modifying protein 5 [Rattus norvegicus]
FM166377	3579	M021--G12_084	ref|XP_696106.2| PREDICTED: similar to nucleolar protein 9 [Danio rerio]
FM166108	3314	M065--H7_049	gb|AAH65437.1| Nucleobindin 2a [Danio rerio]
FM169689	1424	M043--C4_028	Transcribed locus, weakly similar to XP_695164.2 PREDICTED: similar to putative CDT1 protein [Danio rerio]
FM172601	1920	M070--A11_095	Transcribed locus, moderately similar to NP_006798.1 chromobox homolog 1 (HP1 beta homolog Drosophila ) [Homo sapiens]
FM167223	2406	M079--A7_063	Transcribed locus, moderately similar to NP_031396.1 replication factor C 5 isoform 1 [Homo sapiens]
FM168362	3185	M062--H5_033	gb|AAD19348.1| reverse transcriptase-like protein [Takifugu rubripes]
FM166929	346	M018--D2_010	emb|CAP09241.1| topoisomerase (DNA) II alpha [Danio rerio]
FM167294	319	M048--D8_058	ref|NP_001027798.1| SMC3 protein [Takifugu rubripes]
FM166293	2120	M021--B8_062	ref|NP_001096593.1| ligase IV, DNA, ATP-dependent [Danio rerio]
FM166402	2869	M049--B8_062	ref|NP_958475.1| nucleosome assembly protein 1, like 1 [Danio rerio]
FM166664	2624	M062--H12_082	Transcribed locus, weakly similar to NP_571552.1 major histocompatibility complex class II DEB [Danio rerio]
FM170838	2663	M030--B3_029	ref|XP_001336767.1| PREDICTED: similar to transposase [Danio rerio]
FM169508	192	m013--F2_006	Transcribed locus, moderately similar to NP_997975.1 structural maintenance of chromosomes 1A [Danio rerio]
FM167293	14	M047--H8_050	gb|ABV31710.1| transposase [Salmo salar]
FM172702	2900	M033--G1_003	gb|AAN15747.1| reverse transcriptase-like protein [Paralichthys olivaceus]
FM167757	3272	M072--A12_096	gb|AAH97046.1| Supt6h protein [Danio rerio]
FM166360	2664	M042--A4_032	ref|XP_001332732.1| PREDICTED: similar to transposase [Danio rerio]
FM166262	2818	M052--B11_093	Transcribed locus, weakly similar to NP_001013559.1 X-ray repair complementing defective repair in Chinese hamster cells 3 [Danio rerio]
FM168013	3385	M076--H5_033	gb|AAP49009.1| transposase [Rana pipiens]
FM166386	3261	M011--D12_090	ref|NP_001007120.1| helentron 5 helitron-like transposon
FM167280	57	M024--F3_021	ref|XP_001338906.1| PREDICTED: similar to transposase [Danio rerio]
FM165928	2308	M044--F3_021	ref|XP_001342845.1| PREDICTED: similar to DNA polymerase alpha [Danio rerio]
FM169422	2617	M052--C5_043	Transcribed locus, weakly similar to NP_956435.1 ZW10 homolog, centromere/kinetochore protein [Danio rerio]
FM166627	1734	M016--A8_064	ref|XP_001364044.1| PREDICTED: similar to MCM6 minichromosome maintenance deficient 6
FM166666	1746	M031--C3_027	ref|XP_696090.1| PREDICTED: similar to DNA binding protein p96PIF [Danio rerio]
FM166581	2425	M063--G3_019	ref|XP_001190181.1| PREDICTED: similar to transposase [Strongylocentrotus purpuratus]
FM166971	3001	M065--A4_032	Transcribed locus, moderately similar to XP_687696.2 PREDICTED: similar to AHNAK nucleoprotein [Danio rerio]
FM166202	2331	M084--C6_044	Transcribed locus, moderately similar to NP_001026049.1 TAR DNA binding protein [Gallus gallus]
FM167091	3412	M087--G12_084	Transcribed locus, moderately similar to NP_001027927.1 SMC4 protein [Takifugu rubripes]
FM167761	2608	M051--G6_036	Transcribed locus, moderately similar to XP_533797.2 PREDICTED: similar to polybromo 1 isoform 2 isoform 1 [Canis familiaris]
FM170341	600	M005--D9_073	Transcribed locus, moderately similar to NP_998335.1 telomerase binding protein, p23 [Danio rerio]
FM167088	2796	m014--C2_012	Transcribed locus, moderately similar to NP_955875.1 polymerase (DNA-directed), alpha (70kD) [Danio rerio]
FM166515	2459	M070--A3_031	ref|XP_001342903.1| PREDICTED: similar to transposase [Danio rerio]
FM170167	2862	M067--E9_071	Transcribed locus, weakly similar to NP_490597.1 bromodomain-containing protein 4 isoform long [Homo sapiens]
FM172031	1193	M023--F11_085	Transcribed locus, moderately similar to NP_057179.1 DNA replication complex GINS protein PSF2 [Homo sapiens]
FM167169	673	M047--B2_014	ref|XP_001182107.1| PREDICTED: similar to transposase [Strongylocentrotus purpuratus]
FM170199	3622	M029--G8_052	ref|XP_001200565.1| PREDICTED: similar to putative reverse transcriptase
FM168465	3014	M055--F3_021	gb|ABO45231.1| reverse transcriptase [Ostrinia nubilalis]
FM166482	1184	M054--C12_092	Transcribed locus, moderately similar to NP_001035337.1 polymerase (DNA directed), eta [Danio rerio]
FM167892	1525	M091--E7_055	Transcribed locus, weakly similar to NP_571552.1 major histocompatibility complex class II DEB [Danio rerio]
FM169042	2757	M066--D12_090	Transcribed locus, moderately similar to NP_002906.1 replication factor C 3 isoform 1 [Homo sapiens]
FM167737	1234	M072--B12_094	ref|XP_001345680.1| PREDICTED: similar to SI:dZ173M20.16 (novel transposase) [Danio
FM165883	2690	m010--G4_020	ref|XP_001515795.1| PREDICTED: similar to centrosome-associated protein 350
FM168442	333	M027--B8_062	Transcribed locus, weakly similar to NP_766186.2 WD repeat and HMG-box DNA binding protein 1 [Mus musculus]
FM170595	2657	M053--C3_027	ref|XP_001203881.1| PREDICTED: similar to transposase [Strongylocentrotus purpuratus]
FM169706	2114	M047--G4_020	ref|XP_001363073.1| PREDICTED: similar to bromodomain containing 1, isoform 1
FM166295	3271	M011--C10_076	ref|XP_001338227.1| PREDICTED: similar to transposase (putative) [Danio rerio]
RNA biosynthesis, maturation and stability (60)
FM168997	2472	M066--A10_080	Transcribed locus, weakly similar to NP_999931.1 mediator of RNA polymerase II transcription, subunit 25 homolog [Danio rerio]
FM167313	116	M067--F2_006	Transcribed locus, moderately similar to NP_061903.2 DEAH (Asp-Glu-Ala-His) box polypeptide 29 [Homo sapiens]
FM166429	3437	M067--A3_031	Transcribed locus, moderately similar to NP_956520.2 ribonuclease H2, subunit A [Danio rerio]
FM168450	1732	M076--G5_035	Transcribed locus, weakly similar to NP_003073.1 small nuclear RNA activating complex, polypeptide 1, 43kDa [Homo sapiens]
FM166499	1782	m012--C12_092	Transcribed locus, weakly similar to XP_417768.1 PREDICTED: similar to U7 snRNP-specific Sm-like protein LSM10 [Gallus gallus]
FM168400	1339	m012--G1_003	ref|NP_956798.1| PRP31 pre-mRNA processing factor 31 homolog [Danio rerio]
FM166278	3262	M063--A5_047	ref|XP_696443.2| PREDICTED: similar to DEAH (Asp-Glu-Ala-His) box polypeptide 9 [Danio
FM168395	1954	M024--C7_059	Transcribed locus, strongly similar to NP_001012096.1 cytotoxic granule-associated RNA binding protein 1 [Rattus norvegicus]
FM167136	144	M073--F7_053	Transcribed locus, moderately similar to NP_956291.1 TAR (HIV) RNA binding protein 2 [Danio rerio]
FM167000	1191	M050--D1_009	Transcribed locus, weakly similar to NP_055871.1 ribosomal RNA processing 1 homolog B [Homo sapiens]
FM168576	1262	M017--D8_058	Transcribed locus, moderately similar to NP_653333.1 E1B-55kDa-associated protein 5 isoform d [Homo sapiens]
FM169719	2573	M087--E4_024	ref|XP_698609.2| PREDICTED: DEAH (Asp-Glu-Ala-His) box polypeptide 15 [Danio rerio]
FM166370	734	M046--H3_017	Transcribed locus, moderately similar to NP_001008304.1 small nuclear ribonucleoprotein polypeptide A [Rattus norvegicus]
FM167306	1755	J-.25_024	ref|XP_001331977.1| PREDICTED: similar to RNA helicase [Danio rerio]
FM168761	675	M004--F10_080	emb|CAA06160.1| U2 snRNP-specific A' protein [Salmo salar]
FM165984	1405	M028--E2_008	emb|CAE47761.1| novel protein similar to human pre-mRNA cleavage complex II protein
FM168182	871	M027--E3_023	Transcribed locus, strongly similar to NP_058893.1 CUG triplet repeat,RNA-binding protein 2 [Rattus norvegicus]
FM167425	1501	M047--E9_071	ref|NP_957426.1| TIA1 cytotoxic granule-associated RNA binding protein-like 1 [Danio
FM168964	492	M088--G2_004	Transcribed locus, strongly similar to NP_038691.1 splicing factor, arginine/serine-rich 3 (SRp20) [Mus musculus]
FM171597	3301	M086--E6_040	ref|XP_001498274.1| PREDICTED: similar to splicing factor 3a, subunit 1, 120kDa isoform 1
FM166497	2457	M087--D3_025	Transcribed locus, moderately similar to NP_001524.2 heterogeneous nuclear ribonucleoprotein L isoform a [Homo sapiens]
FM166531	179	M026--G6_036	Transcribed locus, weakly similar to XP_001190232.1 PREDICTED: similar to RNA-directed DNA polymerase (Reverse transcriptase) [Strongylocentrotus purpuratus]
FM170391	1662	M073--D8_058	ref|NP_001003847.1| Tho2 [Danio rerio]
FM168071	3198	M024--B1_013	ref|XP_001512808.1| PREDICTED: similar to 30kDa splicing factor; SPF 30
FM166693	1064	M064--A6_048	gb|AAH44541.1| DEAD/H (Asp-Glu-Ala-Asp/His) box polypeptide 19 (DBP5 homolog,
FM166630	846	M025--H8_050	ref|XP_417288.2| PREDICTED: similar to regulator of nonsense transcripts 2 [Gallus
FM167721	347	M077--A10_080	ref|NP_001093608.1| RNA binding motif protein 5 [Danio rerio]
FM166552	2060	m014--B10_078	emb|CAM14242.1| TAF6 RNA polymerase II, TATA box binding protein (TBP)-associated
FM167509	579	M065--E2_008	emb|CAK04939.1| splicing factor 3a, subunit 3 [Danio rerio]
FM166301	323	M040--H8_050	Transcribed locus, strongly similar to NP_001002417.1 mediator of RNA polymerase II transcription, subunit 31 homolog [Danio rerio]
FM168606	3540	m014--C8_060	Transcribed locus, strongly similar to NP_956629.1 mediator of RNA polymerase II transcription, subunit 18 homolog [Danio rerio]
FM166077	3609	M031--B11_093	Transcribed locus, moderately similar to NP_001104765.1 heterogeneous nuclear ribonucleoprotein A3 isoform b [Rattus norvegicus]
FM166668	415	M038--F7_053	ref|NP_001093575.1| ribonuclease like 2 [Danio rerio]
FM167410	898	M039--D8_058	ref|NP_001004520.1| PRP39 pre-mRNA processing factor 39 homolog [Danio rerio]
FM168641	2197	M070--E6_040	Transcribed locus, moderately similar to XP_001331937.1 PREDICTED: similar to Pnn protein [Danio rerio]
FM167359	152	M025--E5_039	Transcribed locus, strongly similar to NP_571524.1 ELAV-like protein 3 [Danio rerio]
FM168532	377	M069--F12_086	emb|CAM13009.2| novel protein similar to mouse DEAH (Asp-Glu-Ala-His) box polypeptide
FM168671	2343	m009--C5_043	Transcribed locus, strongly similar to NP_001007839.1 small nuclear ribonucleoprotein D3 polypeptide 18kDa [Gallus gallus]
FM169894	2755	M091--B2_014	Transcribed locus, strongly similar to NP_006224.1 DNA directed RNA polymerase II polypeptide I [Homo sapiens]
FM167279	1975	M072--H4_018	sp|Q9DGM7|MVP_ICTPU Major vault protein (MVP)
FM166779	1956	M068--D9_073	Transcribed locus, strongly similar to NP_001002719.1 IMP4, U3 small nucleolar ribonucleoprotein, homolog [Danio rerio]
FM166770	132	M081--B1_013	Transcribed locus, strongly similar to NP_001011986.1 splicing factor 3a, subunit 2, 66kDa [Rattus norvegicus]
FM167866	1735	M069--D11_089	gb|AAH85402.1| Cleavage and polyadenylation specific factor 3 [Danio rerio]
FM169361	112	M088--F1_005	gb|EDL96690.1| ribophorin II, isoform CRA_a [Rattus norvegicus]
FM168069	2482	M068--G5_035	ref|XP_861224.1| PREDICTED: similar to RNA-binding protein 5 (RNA binding motif
FM166113	2616	m010--G6_036	ref|XP_001498274.1| PREDICTED: similar to splicing factor 3a, subunit 1, 120kDa isoform 1
FM169024	2787	M078--E10_072	Transcribed locus, weakly similar to NP_004583.2 splicing factor, arginine/serine-rich 8 [Homo sapiens]
FM166579	3093	m015--G8_052	emb|CAM12918.1| polymerase (RNA) I polypeptide C [Danio rerio]
FM169518	1462	M059--E12_088	Transcribed locus, weakly similar to NP_989827.1 heterogeneous nuclear ribonucleoprotein H1 (H) [Gallus gallus]
FM167234	3168	M050--G6_036	Transcribed locus, strongly similar to NP_001003564.1 polymerase (RNA) II (DNA directed) polypeptide E [Danio rerio]
FM168930	2585	M084--F12_086	ref|XP_001363358.1| PREDICTED: similar to CTDSPL2 protein [Monodelphis domestica]
FM167570	3402	m008--C10_076	Transcribed locus, weakly similar to NP_671477.1 rRNA promoter binding protein [Rattus norvegicus]
FM170512	1415	M018--B11_093	Transcribed locus, moderately similar to XP_707039.1 PREDICTED: similar to RNA binding motif protein 4 isoform 3 [Danio rerio]
FM167396	3588	M089--H9_065	Transcribed locus, moderately similar to NP_001014024.1 RNA binding motif protein 13 [Rattus norvegicus]
FM167781	1695	M062--H2_002	Transcribed locus, moderately similar to NP_001002375.1 RD RNA binding protein [Danio rerio]
FM172234	3460	m015--A2_016	ref|XP_684213.2| PREDICTED: polymerase (RNA) II (DNA directed) polypeptide B isoform
FM170989	494	M062--F11_085	Transcribed locus, strongly similar to NP_009011.1 Sm protein F [Homo sapiens]
FM166227	1348	M089--G11_083	Transcribed locus, moderately similar to NP_989641.1 quaking homolog, KH domain RNA binding [Gallus gallus]
FM166796	770	M083--B2_014	Transcribed locus, moderately similar to XP_001507308.1 PREDICTED: similar to DEAD Box Protein 5, partial [Ornithorhynchus anatinus]
FM167771	3278	M035--A3_031	Transcribed locus, weakly similar to XP_850586.1 PREDICTED: similar to transcription termination factor, RNA polymerase I [Canis familiaris]
Protein biosynthesis, conformation and degradation (100)
FM168330	438	M018--F11_085	Transcribed locus, strongly similar to NP_001026004.1 ribosomal protein S11 [Gallus gallus]
FM168915	3319	M059--D11_089	Transcribed locus, strongly similar to NP_001012828.1 ubiquitin-conjugating enzyme E2N [Gallus gallus]
FM166204	2937	M011--B3_029	ref|NP_001002504.2| HECT domain containing 1 [Danio rerio]
FM167289	2564	M077--B11_093	Transcribed locus, moderately similar to XP_707456.1 PREDICTED: cysteinyl-tRNA synthetase isoform 5 [Danio rerio]
FM167908	1139	M080--F12_086	Transcribed locus, strongly similar to NP_001032429.1 eukaryotic translation initiation factor 6 [Rattus norvegicus]
FM170560	2074	M066--G8_052	ref|XP_001508736.1| PREDICTED: similar to DCN1, defective in cullin neddylation 1,
FM168111	3191	M021--F4_022	gb|AAI28795.1| Aars protein [Danio rerio]
FM167730	2681	M059--A5_047	Ribosomal protein L11
FM166001	20	M058--G12_084	ref|XP_691215.2| PREDICTED: similar to ubiquitin specific peptidase 7 (herpes
FM168075	337	M058--D8_058	Transcribed locus, weakly similar to XP_697505.2 PREDICTED: similar to serine proteinase inhibitor, clade B, member 1 [Danio rerio]
FM169740	2141	M020--F4_022	Transcribed locus, weakly similar to NP_005485.1 DnaJ (Hsp40) homolog, subfamily B, member 6 isoform b [Homo sapiens]
FM169617	2487	M061--C12_092	ref|XP_691215.2| PREDICTED: similar to ubiquitin specific peptidase 7 (herpes
FM166541	1365	m009--E4_024	Transcribed locus, strongly similar to NP_998068.1 eukaryotic translation initiation factor 2B, subunit 2 beta [Danio rerio]
FM165953	410	m012--C6_044	Transcribed locus, strongly similar to NP_036099.1 proteasome (prosome, macropain) subunit, alpha type 7 [Mus musculus]
FM166493	2162	M054--D9_073	Transcribed locus, strongly similar to NP_033481.1 ubiquitin-conjugating enzyme E2E 1, UBC4/5 homolog [Mus musculus]
FM171185	2737	m010--G9_067	Transcribed locus, strongly similar to NP_001005528.1 ribosomal protein s25 [Rattus norvegicus]
FM167298	3531	M074--F12_086	Transcribed locus, moderately similar to NP_998242.1 ubiquitin-like, containing PHD and RING finger domains, 1 [Danio rerio]
FM168535	2163	m013--F7_053	Transcribed locus, strongly similar to XP_693456.1 PREDICTED: ubiquitin-conjugating enzyme E2L 3, like isoform 3 [Danio rerio]
FM172508	1817	M063--E3_023	Transcribed locus, strongly similar to NP_001002500.1 otubain 1 [Danio rerio]
FM166761	2719	M018--A7_063	Transcribed locus, weakly similar to NP_001013309.2 tRNA phosphotransferase 1 [Danio rerio]
FM166098	2108	M074--H3_017	ref|NP_919343.1| ubiquitination factor E4B, UFD2 homolog [Danio rerio]
FM167594	2327	M059--E9_071	Transcribed locus, strongly similar to NP_006494.1 proteasome 26S ATPase subunit 4 isoform 1 [Homo sapiens]
FM168714	75	M016--B9_077	ref|NP_997876.1| eukaryotic translation initiation factor 2 [Danio rerio]
FM165797	2329	M018--A9_079	Transcribed locus, strongly similar to NP_001008345.1 eukaryotic translation termination factor 1 [Rattus norvegicus]
FM170327	2492	m015--B9_077	Transcribed locus, strongly similar to NP_001029306.1 eukaryotic translation initiation factor 3, subunit 6 interacting protein [Rattus norvegicus]
FM167053	2592	M024--H9_065	Transcribed locus, strongly similar to XP_683822.1 PREDICTED: similar to 40S ribosomal protein S27 isoform 1 [Danio rerio]
FM167671	3292	M069--F7_053	sp|Q8N5X7|IF4E3_HUMAN Eukaryotic translation initiation factor 4E type 3 (eIF4E type 3)
FM165826	2321	M016--C12_092	Transcribed locus, moderately similar to NP_001013186.1 DnaJ (Hsp40) homolog, subfamily C, member 8 [Rattus norvegicus]
FM170449	3491	M092--D6_042	tpe|CAL69070.1| TPA: putative 60S ribosomal protein L27 isoform 1 [Spadella
FM169716	1206	M028--D1_009	Transcribed locus, weakly similar to NP_001091384.1 Np95-like ring finger protein [Xenopus laevis]
FM167939	1124	M016--H10_066	Transcribed locus, moderately similar to NP_997976.1 zuotin related factor 1 [Danio rerio]
FM166155	2083	M092--F12_086	ref|XP_696015.2| PREDICTED: similar to eukaryotic translation initiation factor 2C, 3
FM166841	311	M044--E2_008	Transcribed locus, strongly similar to NP_001007767.1 stress-induced-phosphoprotein 1 (Hsp70/Hsp90-organizing protein) [Danio rerio]
FM169724	2992	M044--B10_078	sp|P11706|IPK1_ANGAN Probable pancreatic secretory proteinase inhibitor (PSTI type)
FM169658	342	M016--G9_067	ref|NP_991101.1| rp42 homolog [Danio rerio]
FM168481	1428	M089--E10_072	Transcribed locus, moderately similar to NP_571227.1 proteasome (prosome, macropain) subunit, beta type, 6 [Danio rerio]
FM170862	1676	M018--G10_068	Transcribed locus, weakly similar to NP_076003.2 mitochondrial ribosomal protein S9 [Mus musculus]
FM172609	2460	M004--A6_038	Transcribed locus, strongly similar to NP_001032369.1 ubiquitin-conjugating enzyme E2D 2 [Rattus norvegicus]
FM166888	3094	M042--G6_036	Transcribed locus, strongly similar to NP_001007480.1 ribosomal protein L4 [Gallus gallus]
FM171166	652	M033--A5_047	40S ribosomal protein S24
FM167689	2025	M038--E7_055	Membrane-type matrix metalloproteinase
FM167667	1156	m014--G11_083	ref|NP_001084194.1| XRnf12C protein [Xenopus laevis]
FM167062	3015	M005--E1_007	Transcribed locus, strongly similar to NP_001004283.1 eukaryotic translation initiation factor 3 subunit D [Rattus norvegicus]
FM171178	1024	M045--E12_088	ref|NP_919343.1| ubiquitination factor E4B, UFD2 homolog [Danio rerio]
FM169467	1713	M004--F4_032	Transcribed locus, moderately similar to XP_418609.2 PREDICTED: similar to dnaJ-like protein [Gallus gallus]
FM169738	3452	m014--E2_008	Transcribed locus, moderately similar to NP_064576.1 mitochondrial ribosomal protein S22 [Homo sapiens]
FM167052	3554	M030--B11_093	ref|XP_421165.2| PREDICTED: similar to ubiquitin ligase E3 alpha-I [Gallus gallus]
FM169512	516	M045--A11_095	Transcribed locus, moderately similar to NP_001025285.1 mitochondrial ribosomal protein S18A like [Danio rerio]
FM166863	3144	M038--F2_006	ref|NP_001071003.1| DnaJ homolog subfamily C member 1-like [Danio rerio]
FM167316	3635	M037--A7_063	Transcribed locus, moderately similar to NP_956793.1 nedd8 activating enzyme E1 subunit 1 [Danio rerio]
FM168898	2808	M091--B11_093	ref|YP_073241.1| translation initiation factor IF-2 [Borrelia garinii PBi]
FM166741	3235	M021--H9_065	gb|AAH54934.1| Usp40 protein [Danio rerio]
FM166163	1690	M037--A4_032	Transcribed locus, strongly similar to NP_775370.1 eukaryotic translation elongation factor 1 gamma [Danio rerio]
FM170313	3222	M067--H2_002	ref|NP_001014311.1| eukaryotic translation initiation factor 4, gamma 2a [Danio rerio]
FM166685	1712	M035--B2_014	Transcribed locus, strongly similar to NP_001012551.1 chaperonin containing TCP1, subunit 2 (beta) [Gallus gallus]
FM166255	1510	M019--A2_016	ref|XP_532138.2| PREDICTED: similar to ubiquitin protein ligase E3 component
FM168483	3291	M021--A4_032	Transcribed locus, strongly similar to NP_963878.2 ribosomal protein L12 [Danio rerio]
FM171605	2185	M074--E8_056	Transcribed locus, moderately similar to NP_991317.1 proteasome (prosome, macropain) 26S subunit, non-ATPase, 10 [Danio rerio]
FM167805	1094	M031--E7_055	Transcribed locus, moderately similar to NP_878283.1 serine (or cysteine) proteinase inhibitor, clade C (antithrombin), member 1 [Danio rerio]
FM166625	3170	M052--G4_020	Transcribed locus, moderately similar to NP_571450.1 proteasome activator subunit 1 [Danio rerio]
FM166009	2268	M068--A4_032	Transcribed locus, moderately similar to NP_001014311.1 eukaryotic translation initiation factor 4, gamma 2a [Danio rerio]
FM169343	1289	M022--D5_041	Transcribed locus, strongly similar to NP_001002155.1 ribosomal protein L21 [Danio rerio]
FM168806	2529	M087--H6_034	Timp-2a mRNA for tissue inhibitor of metalloproteinase-2a
FM171519	2966	M061--E10_072	gb|AAT68096.1| eukaryotic translation initiation factor 3 subunit 6 [Danio rerio]
FM172396	677	M031--H11_081	Transcribed locus, moderately similar to NP_054895.1 ubiquitin-conjugating enzyme E2T (putative) [Homo sapiens]
FM167017	894	M032--A5_047	ref|NP_001012572.1| WW domain containing E3 ubiquitin protein ligase 1 [Gallus gallus]
FM168093	906	M076--C11_091	Transcribed locus, weakly similar to NP_956370.1 methionyl-tRNA synthetase [Danio rerio]
FM167395	2055	M024--B12_094	ref|NP_775393.2| mind bomb [Danio rerio]
FM165774	1098	M051--G11_083	Transcribed locus, strongly similar to NP_001025975.1 eukaryotic translation initiation factor 1A, Y chromosome [Gallus gallus]
FM171822	2709	M064--F4_022	Transcribed locus, weakly similar to NP_083547.1 mitochondrial ribosomal protein L32 [Mus musculus]
FM165718	2950	M052--H12_082	Transcribed locus, moderately similar to NP_778166.1 mitochondrial ribosomal protein L22 [Mus musculus]
FM166195	349	M054--A1_015	ref|NP_998392.1| ubiquitin specific peptidase 33 [Danio rerio]
FM166122	1834	M050--E4_024	ref|NP_001001943.1| SMAD specific E3 ubiquitin protein ligase 1 [Danio rerio]
FM169572	24	M085--A11_095	Transcribed locus, moderately similar to NP_998227.1 ubiquitin-like modifier activating enzyme 1 [Danio rerio]
FM169604	261	m015--B10_078	Transcribed locus, moderately similar to NP_998484.1 F-box and WD repeat domain containing 5 [Danio rerio]
FM165991	1430	M070--C9_075	Transcribed locus, moderately similar to NP_001003709.1 Ufm1-conjugating enzyme 1 [Rattus norvegicus]
FM170028	1562	M056--C12_092	Transcribed locus, strongly similar to NP_001038760.2 phenylalanyl-tRNA synthetase, alpha subunit [Danio rerio]
FM165728	1703	M056--A2_016	Transcribed locus, strongly similar to NP_957293.1 eukaryotic translation initiation factor 3, subunit G [Danio rerio]
FM166228	2417	M081--B11_093	ref|XP_699804.2| PREDICTED: similar to Aspartyl-tRNA synthetase 2 (mitochondrial)
FM169421	3339	M056--E4_024	Transcribed locus, moderately similar to XP_001231402.1 PREDICTED: similar to mitochondrial ribosomal protein S35 isoform 1 [Gallus gallus]
FM169123	1710	m008--G5_035	Transcribed locus, strongly similar to NP_620814.1 ribosomal protein L15 [Rattus norvegicus]
FM167755	2165	M023--E1_007	Transcribed locus, strongly similar to NP_060769.3 ubiquitin-conjugating enzyme E2W (putative) isoform 2 [Homo sapiens]
FM170406	3582	M073--E6_040	Transcribed locus, moderately similar to NP_031943.3 eukaryotic translation initiation factor 4E [Mus musculus]
FM171542	717	m013--G10_068	Transcribed locus, strongly similar to NP_001011990.1 eukaryotic translation initiation factor 3, subunit 6 [Rattus norvegicus]
FM170999	3490	M055--B11_093	Transcribed locus, strongly similar to NP_956018.1 ribosomal protein L27 [Danio rerio]
FM166794	1353	M028--C2_012	Transcribed locus, weakly similar to NP_001008675.1 mitochondrial ribosomal protein L51 [Gallus gallus]
FM165959	1459	M048--C5_043	Transcribed locus, moderately similar to XP_416882.1 PREDICTED: similar to ubiquitin protein ligase E3A [Gallus gallus]
FM168337	2555	M026--H4_018	ref|NP_001096154.1| rab and DnaJ domain containing [Xenopus tropicalis]
FM168648	3137	M086--F7_053	Transcribed locus, moderately similar to NP_001038754.1 prefoldin subunit 2 [Danio rerio]
FM166138	3467	M028--C1_011	ref|NP_956840.1| proteasome (prosome, macropain) 26S subunit, non-ATPase, 2 [Danio
FM171497	340	M071--H5_033	Transcribed locus, strongly similar to NP_000969.1 ribosomal protein L23 [Homo sapiens]
FM171300	3223	M075--B11_093	Transcribed locus, strongly similar to XP_001518802.1 PREDICTED: similar to eIF-5A2, partial [Ornithorhynchus anatinus]
FM169084	3424	M027--C8_060	Heat shock 70kDa protein 2 isoform
FM168877	3312	M028--C7_059	Transcribed locus, strongly similar to NP_001002609.1 proteasome (prosome, macropain) subunit, beta type, 2 [Danio rerio]
FM169882	2408	M057--G12_084	Aspartyl-tRNA synthetase
FM170331	2523	m007--B12_094	Transcribed locus, strongly similar to NP_957435.1 ubiquitin-like 5 [Danio rerio]
FM167414	2153	m007--B10_078	ref|NP_998350.1| eukaryotic translation initiation factor 5A [Danio rerio]
FM166283	606	m007--G3_019	Transcribed locus, moderately similar to NP_001032260.1 mitochondrial ribosomal protein L47 [Rattus norvegicus]
FM169625	1202	M049--B5_045	Transcribed locus, moderately similar to NP_001006130.1 ubiquitin specific protease 10 [Gallus gallus]
FM166445	1200	M033--D3_025	emb|CAA09099.1| ubiquitin activating enzyme [Takifugu rubripes]
Motor protein (54)
FM168835	1056	M051--H3_017	ref|NP_198299.2| myosin heavy chain-related [Arabidopsis thaliana]
FM166091	303	m008--A10_080	gb|EDM04867.1| dynein-like protein 2 [Rattus norvegicus]
FM166152	1358	M048--A3_031	Transcribed locus, strongly similar to NP_998377.1 myosin, light polypeptide 9, regulatory [Danio rerio]
FM168027	3558	M083--F9_069	gb|EDL25785.1| radixin [Mus musculus]
FM166249	214	M029--H11_081	ref|NP_001025456.1| villin 2 [Danio rerio]
FM166601	2936	M088--G7_051	Myosin heavy chain
FM167676	2892	M024--D4_026	ref|NP_001018326.1| ezrin like [Danio rerio]
FM168568	84	M017--D11_089	sp|Q6VTH5|RSPH1_CYPCA Radial spoke head 1 homolog (Testis-specific gene A2-like protein)
FM166607	1453	M024--D7_057	ref|NP_001027847.1| similar to muscleblind-like 2 [Takifugu rubripes]
FM169498	336	M081--B2_014	Transcribed locus, weakly similar to XP_690998.2 PREDICTED: similar to myosin phosphatase-Rho interacting protein,, partial [Danio rerio]
FM165816	913	M003--E10_072	gb|EAX10840.1| myosin IB, isoform CRA_b [Homo sapiens]
FM167394	3180	M050--C5_043	emb|CAM16772.1| novel protein similar to vertebrate dynein, cytoplasmic, heavy
FM170182	2007	m010--D8_058	Transcribed locus, moderately similar to NP_620409.1 vang-like 1 [Homo sapiens]
FM168366	1107	M086--D11_089	Transcribed locus, strongly similar to NP_031419.1 actin, beta, cytoplasmic [Mus musculus]
FM166800	1994	M025--F7_053	ref|NP_001099152.1| myosin light chain kinase 1 [Danio rerio]
FM167185	1673	M047--G7_051	Transcribed locus, moderately similar to XP_684794.2 PREDICTED: similar to Myomesin 2 [Danio rerio]
FM166641	1180	M030--D12_090	Transcribed locus, moderately similar to NP_991171.1 dynein, light chain, Tctex-type 3 [Danio rerio]
FM168311	2963	M045--B2_014	ref|NP_999680.1| axonemal dynein light chain p33 [Strongylocentrotus purpuratus]
FM169415	1125	M071--C2_012	Transcribed locus, moderately similar to NP_957460.1 dynactin 2 (p50) [Danio rerio]
FM167026	2076	M087--G10_068	Transcribed locus, strongly similar to NP_001003642.1 kaptin (actin binding protein) [Danio rerio]
FM166263	329	M076--F5_037	ref|XP_685233.2| PREDICTED: similar to Kinesin family member 5B [Danio rerio]
FM172272	2332	M004--F7_060	ref|XP_001343295.1| PREDICTED: similar to SWI/SNF related, matrix associated, actin
FM168867	2926	M037--A2_016	dbj|BAB12571.1| myosin heavy chain [Pennahia argentata]
FM167823	3624	M046--F3_021	gb|ABP65301.1| homomeric kinesin Kif17 [Danio rerio]
FM165842	103	M016--C11_091	Transcribed locus, weakly similar to XP_001056855.1 PREDICTED: similar to SWI/SNF-related matrix-associated actin-dependent regulator of chromatin subfamily C member 1 (SWI/SNF complex 155 kDa subunit) (BRG1-associated factor 155) (SWI3-related protein) [
FM169459	2754	M050--H3_017	emb|CAK03623.1| novel protein similar to vertebrate microtubule-actin crosslinking
FM167070	138	M067--C3_027	ref|XP_421162.2| PREDICTED: similar to kinesin-like protein [Gallus gallus]
FM168495	2914	m013--G2_004	ref|XP_683046.2| PREDICTED: similar to nonmuscle myosin heavy chain [Danio rerio]
FM170652	2928	M021--E11_087	ref|XP_001500239.1| PREDICTED: similar to Kinesin-like protein KIF3B (Microtubule plus
FM166368	1036	M064--H7_049	Transcribed locus, moderately similar to NP_001034354.1 coronin, actin binding protein, 1C [Gallus gallus]
FM166767	1294	M073--G1_003	ref|XP_001095126.1| PREDICTED: similar to Myosin-1 (Myosin heavy chain D) (MHC D)
FM167084	2834	M039--D12_090	gb|AAH96779.1| Kif23 protein [Danio rerio]
FM165732	2493	M037--H2_002	Transcribed locus, strongly similar to NP_001007949.1 ARP1 actin-related protein 1 homolog A, centractin alpha [Gallus gallus]
FM169535	3478	M027--E7_055	Transcribed locus, moderately similar to NP_476550.1 kinesin family member 5B [Rattus norvegicus]
FM168419	3366	m013--E6_040	ref|XP_001338983.1| PREDICTED: similar to actopaxin [Danio rerio]
FM166746	2895	M054--F4_022	ref|XP_001372767.1| PREDICTED: similar to dynein, axonemal, heavy polypeptide 5
FM172221	101	M003--G3_021	Transcribed locus, moderately similar to XP_001375787.1 PREDICTED: similar to myosin IIIB, [Monodelphis domestica]
FM168413	985	M055--A11_095	Transcribed locus, weakly similar to XP_001504340.1 PREDICTED: similar to rabkinesin6 [Equus caballus]
FM166353	2918	M076--F9_069	ref|XP_683046.2| PREDICTED: similar to nonmuscle myosin heavy chain [Danio rerio]
FM166948	3285	M067--E5_039	Transcribed locus, weakly similar to NP_955874.1 hyaluronan mediated motility receptor [Danio rerio]
FM166953	166	M074--E10_072	ref|NP_998328.1| autocrine motility factor receptor [Danio rerio]
FM168172	672	M034--G1_003	ref|XP_001231456.1| PREDICTED: similar to skeletal muscle myosin heavy chain
FM169796	1130	M018--F5_037	gb|AAH85669.1| Tbce protein [Danio rerio]
FM170011	2935	M067--G11_083	gb|AAD13771.1| myosin heavy chain [Rana catesbeiana]
FM170400	1784	M033--C5_043	Transcribed locus, moderately similar to NP_956592.1 microtubule-associated protein 1-light chain 3C [Danio rerio]
FM165795	2925	M025--G11_083	ref|XP_001513460.1| PREDICTED: similar to rootletin [Ornithorhynchus anatinus]
FM167871	2292	M061--B7_061	Transcribed locus, moderately similar to XP_001517676.1 PREDICTED: similar to kinesin-related protein, partial [Ornithorhynchus anatinus]
FM167759	1768	M-034-A5_033	gb|EDL95193.1| kinesin family member 16B (predicted), isoform CRA_b [Rattus
FM169451	98	M089--D6_042	ref|XP_684070.2| PREDICTED: similar to myosin IXB, [Danio rerio]
FM168109	2794	M083--D3_025	gb|ABD64539.1| ODF2 [Danio rerio]
FM167514	2122	M027--F4_022	Transcribed locus, moderately similar to NP_956464.1 actin-related protein 10 homolog [Danio rerio]
FM167745	1999	M042--C2_012	Transcribed locus, weakly similar to NP_001004080.1 gelsolin [Rattus norvegicus]
FM169348	1995	M053--G11_083	Transcribed locus, moderately similar to NP_003063.2 SWI/SNF-related matrix-associated actin-dependent regulator of chromatin a4 [Homo sapiens]
FM167573	2913	M091--C11_091	Transcribed locus, strongly similar to NP_998323.1 tropomyosin 4 isoform 2 [Danio rerio]
Cell cycle and cell death (41)
FM168402	3041	M049--A11_095	Transcribed locus, weakly similar to XP_688249.2 PREDICTED: similar to LEK1 [Danio rerio]
FM168633	2591	M047--B9_077	Transcribed locus, weakly similar to XP_001343535.1 PREDICTED: similar to Ccdc5 protein [Danio rerio]
FM169201	3119	M054--E4_024	sp|P85001|CE290_DANRE Centrosomal protein of 290 kDa (Cep290)
FM168467	548	M019--H7_049	Transcribed locus, strongly similar to NP_058036.1 cyclin-dependent kinase 2 isoform 2 [Mus musculus]
FM167896	78	M075--H3_017	ref|XP_001342965.1| PREDICTED: similar to nuclear/mitotic apparatus protein [Danio
FM167412	1718	M018--C1_011	Transcribed locus, moderately similar to NP_957378.1 CDC5 cell division cycle 5-like [Danio rerio]
FM170739	1068	M051--E11_087	Transcribed locus, weakly similar to XP_341842.2 PREDICTED: similar to Cytokinesis, Apoptosis, RNA-associated family member (car-1) [Rattus norvegicus]
FM165764	1708	M030--E5_039	Transcribed locus, moderately similar to NP_998153.1 programmed cell death 4a [Danio rerio]
FM167035	83	M078--G8_052	gb|AAM43814.1| PCM1 [Takifugu rubripes]
FM166765	1742	M078--A7_063	gb|AAI53308.1| Cdk8 protein [Danio rerio]
FM168845	2552	m009--B9_077	Transcribed locus, moderately similar to NP_001006474.1 apoptosis inhibitor 5 [Gallus gallus]
FM168767	874	M060--D11_089	ref|NP_956122.1| cyclin T2 [Danio rerio]
FM167722	3036	M025--D1_009	Transcribed locus, weakly similar to XP_001369278.1 PREDICTED: similar to CDK5RAP2 [Monodelphis domestica]
FM168405	77	M059--E5_039	ref|XP_001342965.1| PREDICTED: similar to nuclear/mitotic apparatus protein [Danio
FM170156	11	M039--H3_017	gb|EAW52073.1| diaphanous homolog 3 (Drosophila), isoform CRA_e [Homo sapiens]
FM165794	3511	M059--H1_001	Transcribed locus, weakly similar to NP_571677.1 death effector domain-containing 1 [Danio rerio]
FM165770	3159	M046--F12_086	ref|XP_689292.2| PREDICTED: similar to DOCK180-related Cdc42 guanine nucleotide
FM165967	3154	M072--F12_086	Transcribed locus, strongly similar to NP_033991.1 cell division cycle 42 [Mus musculus]
FM170994	2806	M089--E1_007	ref|XP_001128967.1| PREDICTED: similar to Mediator of DNA damage checkpoint protein 1
FM166673	968	M067--G12_084	ref|XP_001339596.1| PREDICTED: similar to Dlgh3 protein [Danio rerio]
FM166151	3433	M025--A3_031	ref|NP_955465.1| meiosis-specific nuclear structural protein 1 [Danio rerio]
FM165891	2034	M005--F8_054	ref|XP_001501593.1| PREDICTED: similar to cell division cycle 27, isoform 1 [Equus
FM168646	2053	M061--F2_006	Transcribed locus, moderately similar to NP_001026042.1 cell division cycle 2-like 1 (PITSLRE proteins) [Gallus gallus]
FM169801	467	M026--B3_029	Transcribed locus, moderately similar to NP_001036160.1 caspase 2, apoptosis-related cysteine protease [Danio rerio]
FM167798	383	M067--A1_015	ref|NP_571659.1| period homolog 3 [Danio rerio]
FM166753	852	M018--D12_090	Transcribed locus, moderately similar to NP_003849.2 cyclin K isoform 2 [Homo sapiens]
FM171228	2317	M017--A2_016	ref|NP_991125.1| barrier-to-autointegration factor [Danio rerio]
FM167067	916	M027--H7_049	ref|XP_001510655.1| PREDICTED: similar to growth arrest specific 11 [Ornithorhynchus
FM170047	3580	M025--E2_008	Transcribed locus, weakly similar to NP_076968.1 spermatogenesis associated 5-like 1 [Homo sapiens]
FM166782	3454	M059--G6_036	gb|AAM33247.1| mitotic phosphoprotein 39 [Xenopus laevis]
FM166110	2328	M044--G5_035	ref|XP_001338995.1| PREDICTED: similar to dedicator of cytokinesis 8 [Danio rerio]
FM168499	36	M090--G2_004	Transcribed locus, moderately similar to NP_991134.2 BCL2/adenovirus E1B interacting protein 3-like [Danio rerio]
FM169959	1932	M089--B9_077	ref|NP_001098263.1| spindlin protein A [Oryzias latipes]
FM167086	1958	M057--F1_005	gb|AAH68345.1| Arrdc2 protein [Danio rerio]
FM166556	1997	m006--D11_091	Transcribed locus, moderately similar to NP_001025994.1 suppressor of G2 allele of SKP1 [Gallus gallus]
FM167774	3003	M041--E3_023	Meiosis-specific cohesin subunit SMC1 beta
FM171662	2732	M085--B8_062	ref|NP_001098264.1| spindlin protein B [Oryzias latipes]
FM169314	2959	M037--F2_006	ref|XP_683813.2| PREDICTED: similar to diaphanous homolog 2 (Drosophila), [Danio
FM168269	686	M044--H1_001	Transcribed locus, strongly similar to NP_989656.1 mago-nashi homolog, proliferation-associated [Gallus gallus]
FM172668	1019	J-.89_088	Transcribed locus, moderately similar to XP_001514441.1 PREDICTED: similar to CDK5 regulatory subunit associated protein 1-like 1, partial [Ornithorhynchus anatinus]
FM166207	76	M042--G8_052	ref|XP_001342965.1| PREDICTED: similar to nuclear/mitotic apparatus protein [Danio
Extracellular protein (52)
FM166715	1628	M069--B3_029	Transcribed locus, weakly similar to NP_001008618.1 occludin b [Danio rerio]
FM170148	1108	M060--E4_024	Embryonic alpha-type globin
FM166399	552	M062--B5_045	gb|ABW96797.1| solute carrier family 22, member 5 (predicted) [Papio anubis]
FM168947	2318	M026--E9_071	Vitellogenin 1
FM167106	48	M086--H5_033	Transcribed locus, weakly similar to NP_001096685.1 collagen, type VI, alpha 3 [Canis lupus familiaris]
FM168926	802	M057--F5_037	ref|XP_001196886.1| PREDICTED: similar to putative cell wall protein FLO11p
FM167632	2081	M064--B9_077	dbj|BAE75799.1| Slc26a11 [Takifugu obscurus]
FM167582	2667	M020--F8_054	Transcribed locus, moderately similar to NP_001028893.1 integrin alpha V [Danio rerio]
FM169092	2181	M042--H3_017	ref|NP_571095.1| ba1 globin [Danio rerio]
FM167357	1133	M040--B11_093	gb|AAB88288.1| glutamate transporter 2B [Ambystoma tigrinum]
FM169817	3313	M088--A4_032	Transcribed locus, weakly similar to NP_034794.1 keratin 18 [Mus musculus]
FM166734	2672	M086--C12_092	emb|CAD27803.1| lamC1 [Tetraodon nigroviridis]
FM168361	827	M069--H10_066	Transcribed locus, weakly similar to XP_706574.2 PREDICTED: similar to putative extensin, partial [Danio rerio]
FM167836	1778	M016--D10_074	ref|XP_591031.3| PREDICTED: similar to nephronectin [Bos taurus]
FM166533	212	M005--G3_019	ref|XP_001343241.1| PREDICTED: similar to laminin beta 1; laminin B1, partial [Danio
FM166659	1410	M040--H10_066	ref|NP_001007429.1| cell adhesion molecule 4 [Danio rerio]
FM167670	1413	M050--C1_011	Transcribed locus, weakly similar to NP_956937.1 solute carrier family 30 (zinc transporter), member 4 [Danio rerio]
FM166844	2563	M078--B5_045	Transcribed locus, moderately similar to NP_997948.2 parvalbumin isoform 1c [Danio rerio]
FM170255	1256	M042--A9_079	ref|XP_001473232.1| PREDICTED: similar to Keratin associated protein 10-4 [Mus
FM166528	2229	M024--G6_036	gb|EDL39260.1| solute carrier family 19 (thiamine transporter), member 2, isoform
FM169606	2880	M058--E11_087	ref|XP_001131075.1| PREDICTED: similar to Keratin-associated protein 5-4
FM168902	3160	m009--E3_023	Transcribed locus, weakly similar to NP_062157.1 chondroitin sulfate proteoglycan 5 isoform 1 [Rattus norvegicus]
FM169213	574	M081--A6_048	Transcribed locus, weakly similar to XP_707254.1 PREDICTED: similar to LDLR dan isoform 5 [Danio rerio]
FM165841	1967	M045--D11_089	ref|XP_001334153.1| PREDICTED: similar to thrombospondin [Danio rerio]
FM167242	1795	M046--B3_029	ref|XP_518946.2| PREDICTED: sidekick homolog 1 [Pan troglodytes]
FM170698	3634	M077--G5_035	Transcribed locus, moderately similar to NP_998179.1 solute carrier family 37 (glycerol-3-phosphate transporter), member 2 [Danio rerio]
FM168554	2048	m007--F8_054	ref|NP_001012500.1| protocadherin 15a [Danio rerio]
FM166056	3396	m012--A9_079	ref|XP_690909.2| PREDICTED: similar to nidogen 1, [Danio rerio]
FM165750	220	M084--B10_078	ZPC domain containing protein 2
FM168078	2611	M026--H1_001	Complement component 4 (within H-2S)
FM168079	2612	M036--F12_086	Complement component C3-1
FM167585	843	M077--G6_036	Transcribed locus, weakly similar to NP_742062.1 proline-rich proteoglycan 2 [Rattus norvegicus]
FM166156	2296	M043--G6_036	gb|ABY79118.1| cadherin 2, type 1 preproprotein (predicted) [Callithrix jacchus]
FM165775	2975	M019--E8_056	Transcribed locus, moderately similar to NP_001007345.1 solute carrier family 7, member 6 opposite strand [Danio rerio]
FM166874	3348	M064--E3_023	ref|XP_001343022.1| PREDICTED: similar to cell-adhesion protein plakoglobin [Danio rerio]
FM166014	307	M034--F10_070	Transcribed locus, moderately similar to XP_001339266.1 PREDICTED: similar to connexin 34.4 [Danio rerio]
FM169885	1607	M055--E4_024	ref|NP_001019557.1| integrin, beta 4 [Danio rerio]
FM166624	122	M090--B6_046	ref|XP_707254.1| PREDICTED: similar to LDLR dan isoform 5 [Danio rerio]
FM166362	2502	M073--F5_037	Transcribed locus, weakly similar to NP_001007831.1 solute carrier family 25, member 46 [Gallus gallus]
FM166130	3481	M035--H10_066	Transcribed locus, moderately similar to NP_775564.1 solute carrier family 43, member 2 [Mus musculus]
FM168626	2802	m014--E11_087	ref|XP_001196886.1| PREDICTED: similar to putative cell wall protein FLO11p
FM170088	2180	M023--F3_021	emb|CAD60794.1| novel alpha-type globin [Danio rerio]
FM166918	2901	M053--F9_069	ref|NP_001011879.1| keratin [Takifugu rubripes]
FM168007	1757	M045--G9_067	ref|XP_001344468.1| PREDICTED: similar to tenascin-C [Danio rerio]
FM166292	1729	M055--C7_059	gb|ABL75905.1| protocadherin 2G30 [Takifugu rubripes]
FM168681	815	M016--E9_071	ref|XP_001473232.1| PREDICTED: similar to Keratin associated protein 10-4 [Mus
FM171596	801	M018--B6_046	ref|XP_001196886.1| PREDICTED: similar to putative cell wall protein FLO11p
FM167215	3521	m015--F8_054	Transcribed locus, moderately similar to NP_571144.2 connexin 43.4 [Danio rerio]
FM166016	515	M017--H4_018	Transcribed locus, weakly similar to XP_587920.3 PREDICTED: similar to HEPH [Bos taurus]
FM165913	2297	M056--C6_044	sp|P55019|S12A3_PSEAM Solute carrier family 12 member 3 (Thiazide-sensitive
FM166307	831	m014--G8_052	ref|YP_329350.1| collagen-like surface protein, putative [Streptococcus agalactiae
FM168252	2126	M066--H11_081	ref|NP_001071156.1| LPS-responsive beige-like anchor isoform beta [Mus musculus]
Transmembrane and channel protein (49)
FM168921	3175	M057--C11_091	emb|CAM13125.1| novel protein similar to vertebrate transmembrane channel-like 2
FM167178	2219	M073--G10_068	ref|XP_858330.1| PREDICTED: similar to ankyrin 3, epithelial isoform d isoform 14
FM170252	619	M055--G11_083	ref|NP_999939.1| tetraspanin 7 [Danio rerio]
FM166209	287	M088--G9_067	gb|ABP98938.1| voltage-gated sodium channel alpha type IV [Oncorhynchus mykiss]
FM166747	3311	M055--D11_089	Transcribed locus, weakly similar to NP_443099.1 voltage gated channel like 1 [Homo sapiens]
FM168496	2452	M091--A7_063	Transcribed locus, moderately similar to NP_956151.1 heat shock protein 4 [Danio rerio]
FM165915	1867	M072--A7_063	ref|XP_001067188.1| PREDICTED: similar to Mucin-4 (Tracheobronchial mucin) [Rattus
FM169810	1152	M050--C2_012	Transcribed locus, moderately similar to NP_990072.1 voltage-dependent anion channel 2 [Gallus gallus]
FM167528	962	M049--A1_015	Transcribed locus, moderately similar to NP_705745.3 transmembrane protein 41B [Mus musculus]
FM167944	1794	M051--A11_095	Heat shock protein 10
FM165870	1523	M073--A12_096	pdb|2HBH|A Chain A, Crystal Structure Of Vitamin D Nuclear Receptor Ligand
FM165943	1417	M018--C6_044	Transcribed locus, weakly similar to NP_001099055.1 transmembrane protein 177 [Danio rerio]
FM166756	2335	m009--A7_063	ref|XP_416967.2| PREDICTED: similar to putative 4 repeat voltage-gated ion channel
FM166710	1737	M049--D1_009	ref|XP_698885.2| PREDICTED: similar to SKD3, partial [Danio rerio]
FM167701	2050	M072--G10_068	emb|CAK04945.1| membrane protein, palmitoylated 5 (MAGUK p55 subfamily member 5)
FM169924	816	M060--B12_094	Transcribed locus, weakly similar to NP_001001749.1 lysosomal-associated membrane protein 2 [Gallus gallus]
FM170621	882	M017--E12_088	Transcribed locus, moderately similar to NP_001012576.1 transmembrane protein 106B [Gallus gallus]
FM166237	1122	M050--H2_002	ref|NP_001038329.1| LEM domain containing 3 [Danio rerio]
FM169086	285	M060--H10_066	Transcribed locus, strongly similar to XP_001332024.1 PREDICTED: similar to macoilin-1 [Danio rerio]
FM170195	2804	M084--E10_072	gb|EDP36850.1| erythrocyte membrane protein 3, putative [Brugia malayi]
FM168226	1654	M017--B6_046	ref|XP_001099242.1| PREDICTED: similar to polycystin 2 [Macaca mulatta]
FM168882	541	M066--B4_030	Transcribed locus, weakly similar to NP_056163.1 RW1 protein [Homo sapiens]
FM170526	18	M004--E5_036	gb|AAB96361.1| calcium channel beta3 subunit [Takifugu rubripes]
FM166350	710	M037--D4_026	ref|NP_001033051.1| aryl hydrocarbon receptor 1A [Takifugu rubripes]
FM168349	2620	M080--C10_076	Transcribed locus, weakly similar to NP_081771.2 transmembrane protein 144 [Mus musculus]
FM168010	314	M081--B4_030	Transcribed locus, moderately similar to XP_001107227.1 PREDICTED: similar to transmembrane protein 48 [Macaca mulatta]
FM170300	2102	M083--A2_016	Transcribed locus, weakly similar to NP_001020472.1 Tmeff1 protein [Danio rerio]
FM167262	3116	M031--B2_014	ref|XP_001099042.1| PREDICTED: semaphorin 7A isoform 2 [Macaca mulatta]
FM170023	338	M081--D4_026	ref|NP_001005924.1| transmembrane protein 56 [Danio rerio]
FM165931	907	m012--A3_031	emb|CAM14022.1| mucolipin 1 [Danio rerio]
FM168815	809	M026--E2_008	ref|XP_822953.1| cysteine-rich acidic integral membrane protein precursor [Trypanosoma
FM166244	3	M081--G1_003	Transcribed locus, moderately similar to NP_998828.1 transmembrane protein 33 [Danio rerio]
FM167530	910	M021--D5_041	ref|XP_696740.2| PREDICTED: similar to Transmembrane and coiled-coil domains 4
FM166960	1918	M047--D12_090	Transcribed locus, weakly similar to NP_957092.1 transmembrane protein 126A [Danio rerio]
FM166200	3565	m008--D9_073	Transcribed locus, strongly similar to NP_998694.1 transmembrane protein 50A [Danio rerio]
FM166126	2567	M045--E5_039	ref|ZP_02163681.1| cell surface protein [Kordia algicida OT-1]
FM167807	3084	M070--C7_059	dbj|BAA95015.1| vitamin D receptor b [Paralichthys olivaceus]
FM166157	19	M088--D8_058	gb|AAB96361.1| calcium channel beta3 subunit [Takifugu rubripes]
FM165938	980	M061--A2_016	ref|NP_001069743.1| potassium channel modulatory factor 1 [Bos taurus]
FM168809	2781	M082--G4_020	ref|XP_684855.2| PREDICTED: similar to potassium voltage-gated channel subfamily Q
FM166689	1403	M017--E4_024	dbj|BAE02825.1| aryl hydrocarbon receptor 2 [Pagrus major]
FM166573	3060	M065--G12_084	ref|NP_957121.1| EFR3 homolog A [Danio rerio]
FM168401	3543	M090--C5_043	Transcribed locus, strongly similar to NP_001012934.1 heat shock 60kDa protein 1 (chaperonin) [Gallus gallus]
FM165755	2355	M057--F2_006	Transcribed locus, moderately similar to NP_998236.1 translocation associated membrane protein 2 [Danio rerio]
FM169255	269	M067--D4_026	Transcribed locus, strongly similar to NP_006818.3 transmembrane emp24 domain-containing protein 10 precursor [Homo sapiens]
FM167319	2253	M020--C5_043	Transcribed locus, strongly similar to NP_991162.1 transmembrane protein 32 [Danio rerio]
FM165947	1097	M043--F11_085	Transcribed locus, moderately similar to XP_698885.2 PREDICTED: similar to SKD3, partial [Danio rerio]
FM170002	643	m009--E10_072	gb|AAP83588.1| neuronal-type voltage-gated calcium channel subunit Cav2.2
FM171745	1945	M089--F11_085	ref|XP_689704.1| PREDICTED: similar to potassium channel TWIK-1 [Danio rerio]
Trafficking (41)
FM170225	3125	M075--C6_044	Transcribed locus, moderately similar to NP_998305.1 Vps20-associated 1 homolog [Danio rerio]
FM165940	3089	M052--F5_037	Transcribed locus, strongly similar to NP_006806.1 coated vesicle membrane protein [Homo sapiens]
FM170165	2105	M034--D8_058	ref|XP_686619.2| PREDICTED: similar to synaptotagmin-like protein 5 [Danio rerio]
FM170979	2977	M090--A6_048	Transcribed locus, strongly similar to NP_998485.1 vacuolar protein sorting 24 homolog [Danio rerio]
FM166852	1665	M083--F10_070	ref|XP_001375330.1| PREDICTED: similar to exocyst complex component 6 [Monodelphis
FM167870	1803	m006--D8_063	Transcribed locus, strongly similar to NP_062754.1 vacuolar protein sorting 29 [Mus musculus]
FM166745	2701	M023--A7_063	Transcribed locus, strongly similar to NP_957381.1 transportin 3 [Danio rerio]
FM170299	211	M045--H12_082	ref|NP_001032787.1| sorting nexin 2 [Danio rerio]
FM167982	1577	M057--F8_054	ref|XP_684163.2| PREDICTED: importin 4 [Danio rerio]
FM166134	624	M054--F3_021	gb|AAH10669.1| Syntaxin 12 [Mus musculus]
FM167222	1931	M005--B4_030	Transcribed locus, moderately similar to NP_446107.2 dynamin 1-like [Rattus norvegicus]
FM166225	1952	m014--E5_039	Transcribed locus, moderately similar to NP_001001725.1 intraflagellar transport 88 homolog [Danio rerio]
FM166118	1281	M036--D9_073	Transcribed locus, moderately similar to NP_001007597.1 reticulon 1 isoform RTN1-C [Mus musculus]
FM165881	3058	M041--F4_022	Transcribed locus, moderately similar to NP_001002335.1 karyopherin alpha 2 (RAG cohort 1, importin alpha 1) [Danio rerio]
FM167069	1764	M048--B9_077	ref|NP_001005391.1| clathrin, heavy polypeptide (Hc) [Danio rerio]
FM166995	1758	M037--C7_059	Transcribed locus, moderately similar to NP_956436.1 sorting and assembly machinery component 50 homolog [Danio rerio]
FM169260	1046	M026--E6_040	ref|NP_001027829.1| swan [Takifugu rubripes]
FM167373	3277	M070--F1_005	gb|ABQ59678.1| vacuolar protein sorting 52 [Salmo salar]
FM166384	210	M068--G7_051	Transcribed locus, strongly similar to NP_958864.1 flotillin 1b [Danio rerio]
FM166079	1392	M065--H11_081	ref|NP_957216.1| dynamin 1-like [Danio rerio]
FM166205	1959	m008--D1_009	ref|NP_955976.1| adaptor-related protein complex 1, gamma 1 subunit [Danio rerio]
FM168841	3441	M016--D7_057	ref|NP_956834.1| sorting nexin family member 27 [Danio rerio]
FM168891	115	M072--C9_075	gb|ABQ59678.1| vacuolar protein sorting 52 [Salmo salar]
FM169322	2245	M088--H9_065	ref|XP_422568.2| PREDICTED: similar to APG16L beta [Gallus gallus]
FM172305	1397	M064--B5_045	ref|XP_001498145.1| PREDICTED: similar to valosin [Equus caballus]
FM168464	502	M056--G2_004	Transcribed locus, moderately similar to NP_001017651.1 golgi SNAP receptor complex member 1 [Danio rerio]
FM170663	1000	M055--A10_080	gb|AAO15004.1| sorting nexin 13 [Takifugu rubripes]
FM171273	295	M027--A4_032	Transcribed locus, moderately similar to NP_033524.1 vesicle-associated membrane protein 3 [Mus musculus]
FM166479	1466	M051--F3_021	ref|NP_957216.1| dynamin 1-like [Danio rerio]
FM166396	1318	m007--C6_044	emb|CAI11950.1| SEC5-like 1 (S. cerevisiae) [Danio rerio]
FM166692	967	m010--H10_066	Transcribed locus, weakly similar to NP_956211.1 synaptojanin 2 binding protein [Danio rerio]
FM172743	1479	J-.68_077	ref|NP_001017557.1| septin 10 [Danio rerio]
FM168204	724	M092--C11_091	ref|NP_998055.1| intraflagellar transport 122 homolog [Danio rerio]
FM168949	3526	M087--G3_019	Transcribed locus, weakly similar to XP_512641.2 PREDICTED: similar to galectin-4 [Pan troglodytes]
FM169198	2373	M077--F8_054	Transcribed locus, moderately similar to NP_001027829.1 swan [Takifugu rubripes]
FM166114	706	M075--D8_058	Transcribed locus, moderately similar to NP_062172.1 clathrin, heavy polypeptide (Hc) [Rattus norvegicus]
FM168276	2931	M020--C8_060	Transcribed locus, moderately similar to NP_038961.2 vesicle-associated membrane protein, associated protein A [Mus musculus]
FM168563	2125	M080--H9_065	Transcribed locus, strongly similar to NP_006799.1 Sec61 beta subunit [Homo sapiens]
FM167399	3306	m010--D5_041	Transcribed locus, moderately similar to NP_001017879.1 syntaxin 6 [Danio rerio]
FM165889	1141	M061--D9_073	ref|NP_878281.1| suppressor of ypt1 [Danio rerio]
FM171311	182	M063--G2_004	ref|NP_956195.1| myomegalin [Danio rerio]
Disease-related (65)
FM165852	172	M051--D6_042	emb|CAN88318.1| novel protein similar to vertebrate autoantigen (RCD-8) [Danio
FM168360	3374	M024--A9_079	ref|XP_001334883.1| PREDICTED: similar to pol polyprotein [Danio rerio]
FM171065	1384	J-.84_093	Transcribed locus, moderately similar to NP_001025980.1 non imprinted in Prader-Willi/Angelman syndrome 2 [Gallus gallus]
FM168460	822	M076--E11_087	ref|XP_001343133.1| PREDICTED: similar to pol polyprotein [Danio rerio]
FM167100	8	M040--A6_048	ref|XP_001337848.1| PREDICTED: similar to pol polyprotein [Danio rerio]
FM168090	447	M067--B5_045	ref|XP_694080.2| PREDICTED: similar to pol polyprotein, partial [Danio rerio]
FM166034	3169	M088--E7_055	ref|XP_001334796.1| PREDICTED: similar to Scc2-2A [Danio rerio]
FM169232	2659	M069--B10_078	ref|XP_001922521.1| PREDICTED: similar to RAC-gamma serine/threonine-protein kinase (RAC-PK-gamma) (Protein kinase Akt-3) (Protein kinase B, gamma) (PKB gamma) (STK-2) [Danio rerio]
FM166364	1986	M084--C10_076	ref|XP_519508.2| PREDICTED: myeloid/lymphoid or mixed-lineage leukemia 3 [Pan
FM167963	243	M086--H7_049	Transcribed locus, moderately similar to NP_997725.1 B-cell CLL/lymphoma 7A [Danio rerio]
FM166068	2396	M086--B4_030	ref|XP_001613173.1| tryptophan-rich antigen (Pv-fam-a) [Plasmodium vivax SaI-1]
FM166271	2316	M028--F6_038	ref|XP_001171669.1| PREDICTED: myxovirus resistance protein 2 isoform 1 [Pan
FM168978	2340	M035--C12_092	Transcribed locus, strongly similar to NP_054779.1 malignant T cell amplified sequence 1 [Homo sapiens]
FM165792	9	M074--F5_037	ref|XP_684066.2| PREDICTED: similar to pol polyprotein [Danio rerio]
FM170889	3322	M042--A7_063	ref|XP_419418.2| PREDICTED: similar to NY-REN-45 antigen [Gallus gallus]
FM167415	3462	M073--D1_009	ref|NP_001027877.1| Ellis van Creveld protein-like [Takifugu rubripes]
FM167695	334	m006--C4_023	Transcribed locus, strongly similar to NP_058612.3 bladder cancer associated protein [Mus musculus]
FM169496	2263	M040--E1_007	Transcribed locus, moderately similar to NP_998501.1 cathepsin B, a [Danio rerio]
FM168598	3121	M031--B6_046	Transcribed locus, weakly similar to NP_001039167.1 novel protein similar to ovarian carcinoma immunoreactive antigen (OCIA) [Xenopus tropicalis]
FM166716	3458	M054--B8_062	Transcribed locus, moderately similar to NP_001006291.1 tumor differentially expressed protein 1 [Gallus gallus]
FM166356	28	M061--D1_009	ref|XP_001342396.1| PREDICTED: similar to putative pol protein [Danio rerio]
FM170483	2991	M033--G5_035	ref|XP_694080.2| PREDICTED: similar to pol polyprotein, partial [Danio rerio]
FM166590	1588	M063--D10_074	ref|XP_001338208.1| PREDICTED: similar to pol polyprotein [Danio rerio]
FM167329	1227	M003--H4_041	ref|XP_001332626.1| PREDICTED: similar to CD97 antigen [Danio rerio]
FM168786	155	M033--A8_064	ref|XP_001346088.1| PREDICTED: similar to pol polyprotein [Danio rerio]
FM168594	1563	M003--C1_002	Transcribed locus, strongly similar to NP_001038254.1 neuro-oncological ventral antigen 1 [Danio rerio]
FM168065	1518	M072--E5_039	ref|XP_693147.2| PREDICTED: similar to retinoblastoma-associated factor 600 (RBAF600)
FM166326	2161	M034--H3_017	Transcribed locus, weakly similar to XP_001335649.1 PREDICTED: similar to Nuclear autoantigenic sperm protein (histone-binding) [Danio rerio]
FM166444	1984	M003--D9_075	Transcribed locus, weakly similar to NP_001028889.2 cat eye syndrome chromosome region, candidate 1a [Danio rerio]
FM166850	3378	M019--G4_020	sp|P51112|HD_FUGRU Huntingtin (Huntington disease protein homolog) (HD protein)
FM166578	3142	M036--B12_094	ref|XP_001345592.1| PREDICTED: similar to pol polyprotein [Danio rerio]
FM168819	1236	M022--G7_051	gb|EDM16204.1| metastasis suppressor 1 (predicted), isoform CRA_a [Rattus
FM166619	2157	M004--E1_003	ref|XP_416639.2| PREDICTED: similar to melanoma-associated antigen [Gallus gallus]
FM168994	1278	M058--B1_013	ref|XP_001340884.1| PREDICTED: similar to pol polyprotein [Danio rerio]
FM165875	1298	M017--B4_030	Transcribed locus, moderately similar to NP_998576.1 golgi autoantigen, golgin subfamily a, 5 [Danio rerio]
FM167491	2109	M088--F7_053	Transcribed locus, strongly similar to NP_690842.1 amyloid beta (A4) precursor protein b [Danio rerio]
FM167533	935	M089--A8_064	ref|XP_693147.2| PREDICTED: similar to retinoblastoma-associated factor 600 (RBAF600)
FM165785	107	M021--H2_002	ref|NP_001072058.1| cat eye syndrome candidate region 5 protein [Takifugu rubripes]
FM167417	2300	M041--H10_066	ref|XP_001344511.1| PREDICTED: similar to pol polyprotein [Danio rerio]
FM166240	2175	m012--A7_063	ref|XP_001344511.1| PREDICTED: similar to pol polyprotein [Danio rerio]
FM169466	401	M022--D11_089	Transcribed locus, weakly similar to NP_001001613.1 CD74 antigen (invariant polypeptide of major histocompatibility complex, class II antigen-associated) [Gallus gallus]
FM168216	81	M082--F7_053	ref|XP_001377846.1| PREDICTED: similar to polyprotein [Monodelphis domestica]
FM167790	3539	M043--H7_049	ref|XP_001334479.1| PREDICTED: similar to pol polyprotein [Danio rerio]
FM167164	2842	M076--E12_088	gb|AAT40504.2| Polyprotein, putative [Solanum demissum]
FM166220	2169	m009--E1_007	sp|P51112|HD_FUGRU Huntingtin (Huntington disease protein homolog) (HD protein)
FM167967	1941	M032--H4_018	ref|NP_571589.2| presenilin2 [Danio rerio]
FM169227	2299	m010--E6_040	ref|XP_001344511.1| PREDICTED: similar to pol polyprotein [Danio rerio]
FM166082	2590	M011--G8_052	ref|NP_001032452.1| v-ets erythroblastosis virus E26 oncogene homolog 1b [Danio rerio]
FM166115	2679	M075--F9_069	ref|XP_685025.2| PREDICTED: similar to centrosomal colon cancer autoantigen protein
FM166044	2644	M026--H6_034	ref|XP_700372.2| PREDICTED: similar to meningioma-expressed antigen 5 [Danio rerio]
FM168506	3069	M084--H11_081	ref|XP_001343010.1| PREDICTED: similar to Myeloblastosis oncogene-like 2 [Danio rerio]
FM167553	65	M011--F11_085	ref|XP_001333653.1| PREDICTED: similar to pol polyprotein [Danio rerio]
FM168062	1891	M081--D1_009	ref|XP_692965.2| PREDICTED: myeloid/lymphoid or mixed-lineage leukemia 5 (trithorax
FM169827	1618	M044--E6_040	ref|NP_991251.1| dyslexia susceptibility 1 candidate 1 [Danio rerio]
FM167450	2944	M028--E11_087	ref|XP_001111401.1| PREDICTED: golgi autoantigen, golgin subfamily b, macrogolgin (with
FM170853	174	m008--H7_049	sp|O93279|A4_FUGRU Amyloid beta A4 protein precursor (APP) (ABPP) (Alzheimer disease
FM166722	486	M035--F4_022	ref|XP_001343804.1| PREDICTED: similar to ataxia telangiectasia mutated [Danio rerio]
FM172197	2886	M027--G9_067	gb|AAA29651.1| mature-parasite-infected erythrocyte surface antigen
FM167929	3592	M044--G7_051	Transcribed locus, moderately similar to NP_956063.1 suppression of tumorigenicity 13 [Danio rerio]
FM166116	1664	M046--H7_049	ref|XP_001365895.1| PREDICTED: similar to v-abl Abelson murine leukemia viral oncogene
FM165888	983	M019--E10_072	Transcribed locus, moderately similar to NP_998721.2 jun B proto-oncogene [Danio rerio]
FM166261	756	m010--B9_077	ref|XP_684760.2| PREDICTED: similar to Scc2-2A [Danio rerio]
FM168943	2766	M049--G3_019	ref|XP_001377846.1| PREDICTED: similar to polyprotein [Monodelphis domestica]
FM169045	2365	M085--C5_043	ref|XP_001345592.1| PREDICTED: similar to pol polyprotein [Danio rerio]
FM166928	2776	M064--A5_047	Transcribed locus, moderately similar to NP_001005872.1 HIV-1 tat interactive protein, homolog [Rattus norvegicus]
Protein with binding activity (44)
FM165796	961	m009--A9_079	ref|NP_001002121.1| poly-U binding splicing factor b [Danio rerio]
FM169707	2285	M075--E10_072	Transcribed locus, moderately similar to NP_991316.1 SH3-domain binding protein 4 [Danio rerio]
FM169233	3398	M058--F2_006	Transcribed locus, moderately similar to NP_033767.1 AE binding protein 2 isoform 3 [Mus musculus]
FM171031	2144	M003--F3_028	Transcribed locus, strongly similar to NP_957106.1 FK506 binding protein 1b [Danio rerio]
FM167089	1571	m007--B4_030	ref|XP_001336522.1| PREDICTED: similar to glucocorticoid modulatory element binding
FM166723	2489	M074--H1_001	Transcribed locus, moderately similar to NP_001026003.1 cysteine and histidine-rich domain (CHORD)-containing, zinc binding protein 1 [Gallus gallus]
FM166781	2602	M026--D10_074	Transcribed locus, strongly similar to NP_064320.1 cysteine-rich PDZ-binding protein [Mus musculus]
FM169098	2962	M041--A2_016	Transcribed locus, weakly similar to NP_998389.1 guanine nucleotide binding protein-like 2 (nucleolar) [Danio rerio]
FM165820	2958	M017--D5_041	Transcribed locus, moderately similar to NP_085148.1 SH3-binding domain protein 5-like [Homo sapiens]
FM165759	807	M045--G2_004	Transcribed locus, strongly similar to NP_001002397.1 guanine nucleotide binding protein (G protein), gamma 7 [Danio rerio]
FM167665	2191	M029--G11_083	Y-box binding protein
FM166831	183	M078--D1_009	ref|NP_001025325.1| ATP-binding cassette, sub-family C (CFTR/MRP), member 9 [Danio rerio]
FM168306	2583	M052--A2_016	Transcribed locus, moderately similar to XP_898240.1 PREDICTED: similar to GTP-binding protein 10 (putative) [Mus musculus]
FM168249	1255	M088--G10_068	ref|XP_001315918.1| erythrocyte binding protein, putative [Trichomonas vaginalis G3]
FM168175	2370	M091--C8_060	emb|CAK03678.1| novel protein similar to human ATP-binding cassette, sub-family C
FM170489	328	m013--C4_028	Transcribed locus, moderately similar to NP_955902.1 diazepam binding inhibitor [Danio rerio]
FM168149	1121	M029--A8_064	Transcribed locus, moderately similar to NP_001038623.1 SET binding factor 1 [Danio rerio]
FM167542	3188	m013--A11_095	ref|XP_001342625.1| PREDICTED: immunoglobulin mu binding protein 2 [Danio rerio]
FM168793	1973	m008--H1_001	Transcribed locus, weakly similar to NP_006518.1 stem-loop (histone) binding protein [Homo sapiens]
FM165951	2403	M021--B5_045	ref|XP_001502308.1| PREDICTED: similar to ATP-binding cassette, sub-family C, member 9
FM171870	2985	M047--B4_030	Transcribed locus, strongly similar to NP_001026846.1 poly A binding protein, cytoplasmic 1 a [Danio rerio]
FM168178	134	M043--F2_006	Transcribed locus, weakly similar to NP_001015507.1 Vpr-binding protein [Mus musculus]
FM166839	2084	M075--F2_006	ref|XP_692128.2| PREDICTED: similar to ATP-binding cassette, sub-family A (ABC1),
FM166169	3305	M026--E8_056	ref|NP_997764.1| interleukin enhancer binding factor 3 [Danio rerio]
FM168099	2202	M029--G5_035	ref|NP_938170.1| formin binding protein 3 [Danio rerio]
FM166500	2354	M085--A9_079	gb|AAM43815.1| oxysterol binding protein 1 [Takifugu rubripes]
FM167389	3171	M034--F5_037	ref|NP_001098323.1| guanine nucleotide-binding protein beta subunit [Oryzias latipes]
FM168108	317	M071--H2_002	Transcribed locus, strongly similar to NP_034110.1 C-terminal binding protein 2 [Mus musculus]
FM167945	167	M082--A7_063	ref|NP_659399.2| phosphatidylethanolamine-binding protein 4 [Homo sapiens]
FM169917	2695	M091--D11_089	ref|NP_001002618.1| apolipoprotein A-I binding protein [Danio rerio]
FM166381	638	m008--C3_027	Transcribed locus, strongly similar to NP_938170.1 formin binding protein 3 [Danio rerio]
FM169627	3429	M057--C8_060	gb|EAW57596.1| AP1 gamma subunit binding protein 1, isoform CRA_c [Homo sapiens]
FM171029	325	M085--D9_073	Transcribed locus, moderately similar to NP_963873.1 non-POU domain containing, octamer-binding [Danio rerio]
FM170111	1646	M026--H2_002	ref|XP_689031.2| PREDICTED: similar to HIV-1 Vpr-binding protein [Danio rerio]
FM167370	1423	M060--G4_020	gb|AAG42049.1|AF232933_1 Goodpasture antigen-binding protein D26; GPBPD26 [Bos taurus]
FM167940	2119	M020--A2_016	ref|XP_419510.2| PREDICTED: similar to latent transforming growth factor beta binding
FM172122	2514	M066--H6_034	ref|NP_957176.1| poly A binding protein, cytoplasmic 1 b [Danio rerio]
FM165986	901	M084--H4_018	gb|AAK94779.1| TATA-binding protein associated factor TAFII135 [Mus musculus]
FM170035	2513	m012--H5_033	ref|NP_957176.1| poly A binding protein, cytoplasmic 1 b [Danio rerio]
FM165945	2226	M035--G9_067	Transcribed locus, strongly similar to NP_001006440.1 ATP-binding cassette, sub-family E, member 1 [Gallus gallus]
FM166487	518	M021--H8_050	Transcribed locus, weakly similar to XP_001372792.1 PREDICTED: similar to RanBP2 (Ran-binding protein 2) [Monodelphis domestica]
FM166662	2017	M063--H1_001	Transcribed locus, moderately similar to NP_001026768.1 poly(A) binding protein, cytoplasmic 1 [Gallus gallus]
FM172322	363	M024--C5_043	Transcribed locus, weakly similar to NP_001025995.1 WW domain-containing binding protein 4 [Gallus gallus]
FM169286	1399	M032--H3_017	Transcribed locus, moderately similar to NP_001070721.1 guanine nucleotide binding protein-like 1 [Danio rerio]
WD repeat protein (8)
FM166306	109	M062--H9_065	Transcribed locus, moderately similar to NP_001026845.1 WD repeat domain 23 [Danio rerio]
FM170048	3318	M071--C11_091	Transcribed locus, strongly similar to NP_001019392.1 WD repeat domain 33 [Danio rerio]
FM167020	3032	M022--G5_035	ref|XP_697723.2| PREDICTED: similar to WD repeat domain 66 [Danio rerio]
FM166010	2795	M029--A10_080	ref|NP_001018595.1| WD repeat domain 78 [Danio rerio]
FM166073	2225	M073--D10_074	Transcribed locus, moderately similar to NP_956995.1 WD repeat domain 21 [Danio rerio]
FM172170	2662	m010--B2_014	Transcribed locus, strongly similar to NP_001006135.1 WD repeat domain 82 [Gallus gallus]
FM167270	2923	M048--G1_003	ref|XP_001367266.1| PREDICTED: similar to WD repeat domain 52, [Monodelphis domestica]
FM168313	1581	M032--E2_008	Transcribed locus, weakly similar to NP_001005542.1 WD repeat domain 34 [Rattus norvegicus]
